# Supplementary material for: Who and why: a study of British distrust in the government and media during the COVID-19 pandemic
Source: Research Square preprint supplement (doi:10.21203/rs.3.rs-1564442/v1), 2022-04-18
Supplement: Supplementary file 2 [file 9ab2ace670a8899ec6278e7b.csv]

question	value	percentage	count	timepoint	chi2	p	p_	panel
wearing masks	Yes	85.46984035943026	17882.0	december2020	303.19205634453186	1.6933884787602682e-62	***	F.
wearing masks	Yes but only because I have to	13.516872191951055	2828.0	december2020	303.19205634453186	1.6933884787602682e-62	***	F.
wearing masks	No I am exempt	0.6404741420514292	134.0	december2020	303.19205634453186	1.6933884787602682e-62	***	F.
wearing masks	No I dont think it makes a difference	0.37281330656724976	78.0	december2020	303.19205634453186	1.6933884787602682e-62	***	F.
wearing masks	Yes	80.21256642700844	10264.0	june2021	303.19205634453186	1.6933884787602682e-62	***	F.
wearing masks	Yes but only because I have to	18.552672710221945	2374.0	june2021	303.19205634453186	1.6933884787602682e-62	***	F.
wearing masks	No I am exempt	0.7033447952485151	90.0	june2021	303.19205634453186	1.6933884787602682e-62	***	F.
wearing masks	No I dont think it makes a difference	0.5314160675211004	68.0	june2021	303.19205634453186	1.6933884787602682e-62	***	F.
wearing masks	Yes	80.39034776437191	11327.0	january2022	303.19205634453186	1.6933884787602682e-62	***	F.
wearing masks	Yes but only because I have to	17.608232789212202	2481.0	january2022	303.19205634453186	1.6933884787602682e-62	***	F.
wearing masks	No I am exempt	0.7097232079489	100.0	january2022	303.19205634453186	1.6933884787602682e-62	***	F.
wearing masks	No I dont think it makes a difference	1.291696238466998	182.0	january2022	303.19205634453186	1.6933884787602682e-62	***	F.
restrictions	Yes	60.993212885957355	12761.0	december2020	1529.0791293854238	0.0	***	E.
restrictions	Yes but more needs to be done	29.261064907752605	6122.0	december2020	1529.0791293854238	0.0	***	E.
restrictions	No	9.74572220629003	2039.0	december2020	1529.0791293854238	0.0	***	E.
restrictions	Yes	73.78086902156925	9441.0	june2021	1529.0791293854238	0.0	***	E.
restrictions	Yes but more needs to be done	13.613629259143483	1742.0	june2021	1529.0791293854238	0.0	***	E.
restrictions	No	12.605501719287277	1613.0	june2021	1529.0791293854238	0.0	***	E.
restrictions	Yes	70.81618168914123	9978.0	january2022	1529.0791293854238	0.0	***	E.
restrictions	Yes but more needs to be done	15.798438608942512	2226.0	january2022	1529.0791293854238	0.0	***	E.
restrictions	No	13.385379701916252	1886.0	january2022	1529.0791293854238	0.0	***	E.
government response	No	77.26686104870704	16165.0	december2020	269.5918528709	2.8765568801209884e-59	***	A.
government response	Yes	22.733138951292965	4756.0	december2020	269.5918528709	2.8765568801209884e-59	***	A.
government response	No	77.12566427008441	9869.0	june2021	269.5918528709	2.8765568801209884e-59	***	A.
government response	Yes	22.8743357299156	2927.0	june2021	269.5918528709	2.8765568801209884e-59	***	A.
government response	No	70.08887308922858	9858.0	january2022	269.5918528709	2.8765568801209884e-59	***	A.
government response	Yes	29.911126910771422	4207.0	january2022	269.5918528709	2.8765568801209884e-59	***	A.
media hiding	No	83.04177420896664	17374.0	december2020	36.35271258438801	1.2767585098387334e-08	***	B.
media hiding	Yes	16.95822579103336	3548.0	december2020	36.35271258438801	1.2767585098387334e-08	***	B.
media hiding	No	81.75211003438575	10461.0	june2021	36.35271258438801	1.2767585098387334e-08	***	B.
media hiding	Yes	18.247889965614256	2335.0	june2021	36.35271258438801	1.2767585098387334e-08	***	B.
media hiding	No	80.53229240596167	11347.0	january2022	36.35271258438801	1.2767585098387334e-08	***	B.
media hiding	Yes	19.467707594038323	2743.0	january2022	36.35271258438801	1.2767585098387334e-08	***	B.
vaccines	Yes	93.4375298728611	19549.0	december2020	585.5331553645128	7.13002129417086e-128	***	C.
vaccines	No	6.562470127138897	1373.0	december2020	585.5331553645128	7.13002129417086e-128	***	C.
vaccines	Yes	97.9134104407627	12529.0	june2021	585.5331553645128	7.13002129417086e-128	***	C.
vaccines	No	2.086589559237262	267.0	june2021	585.5331553645128	7.13002129417086e-128	***	C.
vaccines	Yes	97.79276082327893	13779.0	january2022	585.5331553645128	7.13002129417086e-128	***	C.
vaccines	No	2.2072391767210786	311.0	january2022	585.5331553645128	7.13002129417086e-128	***	C.
followed guidelines	Yes	60.12809482841028	12580.0	december2020	465.75988685038544	1.9883348683977644e-97	***	H.
followed guidelines	Yes most of the time	37.826211643246346	7914.0	december2020	465.75988685038544	1.9883348683977644e-97	***	H.
followed guidelines	I used to but I've given up	1.4434566485039668	302.0	december2020	465.75988685038544	1.9883348683977644e-97	***	H.
followed guidelines	No	0.6022368798394035	126.0	december2020	465.75988685038544	1.9883348683977644e-97	***	H.
followed guidelines	Yes	59.02625820568928	7553.0	june2021	465.75988685038544	1.9883348683977644e-97	***	H.
followed guidelines	Yes most of the time	37.09753047827446	4747.0	june2021	465.75988685038544	1.9883348683977644e-97	***	H.
followed guidelines	I used to but I've given up	3.2275711159737415	413.0	june2021	465.75988685038544	1.9883348683977644e-97	***	H.
followed guidelines	No	0.6486402000625195	83.0	june2021	465.75988685038544	1.9883348683977644e-97	***	H.
followed guidelines	Yes	54.50674237047552	7680.0	january2022	465.75988685038544	1.9883348683977644e-97	***	H.
followed guidelines	Yes most of the time	39.410929737402405	5553.0	january2022	465.75988685038544	1.9883348683977644e-97	***	H.
followed guidelines	I used to but I've given up	5.230660042583391	737.0	january2022	465.75988685038544	1.9883348683977644e-97	***	H.
followed guidelines	No	0.8516678495386799	120.0	january2022	465.75988685038544	1.9883348683977644e-97	***	H.
covid origins	Yes	80.398718745518	16817.0	december2020	448.6108864131799	3.849317680797806e-98	***	D.
covid origins	No	19.601281254482	4100.0	december2020	448.6108864131799	3.849317680797806e-98	***	D.
covid origins	Yes	71.97372536753204	9204.0	june2021	448.6108864131799	3.849317680797806e-98	***	D.
covid origins	No	28.026274632467942	3584.0	june2021	448.6108864131799	3.849317680797806e-98	***	D.
covid origins	Yes	72.06529453513129	10154.0	january2022	448.6108864131799	3.849317680797806e-98	***	D.
covid origins	No	27.934705464868703	3936.0	january2022	448.6108864131799	3.849317680797806e-98	***	D.
leaving the house	No	37.12838160787688	7768.0	december2020	6178.299969204892	0.0	***	I.
leaving the house	Yes - I dont trust others to be sensible	22.387917025141	4684.0	december2020	6178.299969204892	0.0	***	I.
leaving the house	No not anymore	18.86530924385814	3947.0	december2020	6178.299969204892	0.0	***	I.
leaving the house	Yes - For other reasons	11.600229423573275	2427.0	december2020	6178.299969204892	0.0	***	I.
leaving the house	Yes - I am scared for my health	5.496606442978684	1150.0	december2020	6178.299969204892	0.0	***	I.
leaving the house	Yes - I am shielding	4.52155625657203	946.0	december2020	6178.299969204892	0.0	***	I.
leaving the house	No	31.87714910909659	4079.0	june2021	6178.299969204892	0.0	***	I.
leaving the house	Yes - I dont trust others to be sensible	10.62050640825258	1359.0	june2021	6178.299969204892	0.0	***	I.
leaving the house	No not anymore	49.882775867458584	6383.0	june2021	6178.299969204892	0.0	***	I.
leaving the house	Yes - For other reasons	3.9152860268834013	501.0	june2021	6178.299969204892	0.0	***	I.
leaving the house	Yes - I am scared for my health	1.8599562363238507	238.0	june2021	6178.299969204892	0.0	***	I.
leaving the house	Yes - I am shielding	1.8443263519849955	236.0	june2021	6178.299969204892	0.0	***	I.
leaving the house	No	34.96096522356281	4926.0	january2022	6178.299969204892	0.0	***	I.
leaving the house	Yes - I dont trust others to be sensible	8.828956706884314	1244.0	january2022	6178.299969204892	0.0	***	I.
leaving the house	No not anymore	49.21930447125621	6935.0	january2022	6178.299969204892	0.0	***	I.
leaving the house	Yes - For other reasons	3.5131298793470545	495.0	january2022	6178.299969204892	0.0	***	I.
leaving the house	Yes - I am scared for my health	1.8594748048261176	262.0	january2022	6178.299969204892	0.0	***	I.
leaving the house	Yes - I am shielding	1.6181689141234918	228.0	january2022	6178.299969204892	0.0	***	I.
covid19 app	yes	57.64971855679616	12495.0	december2020	1259.3707888176687	6.75623141329219e-269	***	G.
covid19 app	no it doesnt work on my phone	17.49561686813694	3792.0	december2020	1259.3707888176687	6.75623141329219e-269	***	G.
covid19 app	no i dont want to be tracked	15.474762388114794	3354.0	december2020	1259.3707888176687	6.75623141329219e-269	***	G.
covid19 app	no i dont trust what the government will do with that data	9.379902186952107	2033.0	december2020	1259.3707888176687	6.75623141329219e-269	***	G.
covid19 app	yes	71.38093072608761	9418.0	june2021	1259.3707888176687	6.75623141329219e-269	***	G.
covid19 app	no it doesnt work on my phone	10.66393815370623	1407.0	june2021	1259.3707888176687	6.75623141329219e-269	***	G.
covid19 app	no i dont want to be tracked	10.724571775049263	1415.0	june2021	1259.3707888176687	6.75623141329219e-269	***	G.
covid19 app	no i dont trust what the government will do with that data	7.230559345156889	954.0	june2021	1259.3707888176687	6.75623141329219e-269	***	G.
covid19 app	yes	67.87411335307486	9856.0	january2022	1259.3707888176687	6.75623141329219e-269	***	G.
covid19 app	no it doesnt work on my phone	7.836925831554301	1138.0	january2022	1259.3707888176687	6.75623141329219e-269	***	G.
covid19 app	no i dont want to be tracked	17.175125680049582	2494.0	january2022	1259.3707888176687	6.75623141329219e-269	***	G.
covid19 app	no i dont trust what the government will do with that data	7.113835135321258	1033.0	january2022	1259.3707888176687	6.75623141329219e-269	***	G.
information sources	tv news	26.52140344857168	15458.0	december2020	341.2678896271234	9.111267341929164e-70	***	J.
information sources	internet news sites	21.856395298962003	12739.0	december2020	341.2678896271234	9.111267341929164e-70	***	J.
information sources	governmental communications	14.52517800463241	8466.0	december2020	341.2678896271234	9.111267341929164e-70	***	J.
information sources	radio	12.16436475937205	7090.0	december2020	341.2678896271234	9.111267341929164e-70	***	J.
information sources	newspapers	10.65625804237797	6211.0	december2020	341.2678896271234	9.111267341929164e-70	***	J.
information sources	social media	7.338080123530926	4277.0	december2020	341.2678896271234	9.111267341929164e-70	***	J.
information sources	word of mouth	5.1231019987990045	2986.0	december2020	341.2678896271234	9.111267341929164e-70	***	J.
information sources	podcasts	1.815218323753968	1058.0	december2020	341.2678896271234	9.111267341929164e-70	***	J.
information sources	tv news	26.22156757216101	9257.0	june2021	341.2678896271234	9.111267341929164e-70	***	J.
information sources	internet news sites	19.726368863835933	6964.0	june2021	341.2678896271234	9.111267341929164e-70	***	J.
information sources	governmental communications	18.788771492507717	6633.0	june2021	341.2678896271234	9.111267341929164e-70	***	J.
information sources	radio	11.432456165198426	4036.0	june2021	341.2678896271234	9.111267341929164e-70	***	J.
information sources	newspapers	10.687476984958783	3773.0	june2021	341.2678896271234	9.111267341929164e-70	***	J.
information sources	social media	6.308245758150865	2227.0	june2021	341.2678896271234	9.111267341929164e-70	***	J.
information sources	word of mouth	4.931592215958983	1741.0	june2021	341.2678896271234	9.111267341929164e-70	***	J.
information sources	podcasts	1.9035209472282808	672.0	june2021	341.2678896271234	9.111267341929164e-70	***	J.
