# Supplementary material for: Who and why: a study of British distrust in the government and media during the COVID-19 pandemic
Source: Research Square preprint supplement (doi:10.21203/rs.3.rs-1564442/v1), 2022-04-18
Supplement: Supplementary file 3 [file e628b590daa95a8bfae21090.csv]

question	value	percentage	count	timepoint	chi2	p	p_	panel
wearing masks	Yes	86.44976760815159	2418.0	december2020	46.95640522693665	1.9089714024518966e-08	***	F.
wearing masks	Yes but only because I have to	12.942438326778694	362.0	december2020	46.95640522693665	1.9089714024518966e-08	***	F.
wearing masks	No I am exempt	0.3932785126921702	11.0	december2020	46.95640522693665	1.9089714024518966e-08	***	F.
wearing masks	No I dont think it makes a difference	0.21451555237754735	6.0	december2020	46.95640522693665	1.9089714024518966e-08	***	F.
wearing masks	Yes	81.44440471934216	2278.0	june2021	46.95640522693665	1.9089714024518966e-08	***	F.
wearing masks	Yes but only because I have to	17.590275294958886	492.0	june2021	46.95640522693665	1.9089714024518966e-08	***	F.
wearing masks	No I am exempt	0.6077940650697176	17.0	june2021	46.95640522693665	1.9089714024518966e-08	***	F.
wearing masks	No I dont think it makes a difference	0.3575259206292456	10.0	june2021	46.95640522693665	1.9089714024518966e-08	***	F.
wearing masks	Yes	82.01644619234895	2294.0	january2022	46.95640522693665	1.9089714024518966e-08	***	F.
wearing masks	Yes but only because I have to	16.267429388630678	455.0	january2022	46.95640522693665	1.9089714024518966e-08	***	F.
wearing masks	No I am exempt	0.7150518412584912	20.0	january2022	46.95640522693665	1.9089714024518966e-08	***	F.
wearing masks	No I dont think it makes a difference	1.0010725777618876	28.0	january2022	46.95640522693665	1.9089714024518966e-08	***	F.
restrictions	Yes	64.67643904183053	1809.0	december2020	293.08999420566124	3.351512904456974e-62	***	E.
restrictions	Yes but more needs to be done	27.708258848766537	775.0	december2020	293.08999420566124	3.351512904456974e-62	***	E.
restrictions	No	7.615302109402933	213.0	december2020	293.08999420566124	3.351512904456974e-62	***	E.
restrictions	Yes	76.2602788702181	2133.0	june2021	293.08999420566124	3.351512904456974e-62	***	E.
restrictions	Yes but more needs to be done	11.977118341079727	335.0	june2021	293.08999420566124	3.351512904456974e-62	***	E.
restrictions	No	11.76260278870218	329.0	june2021	293.08999420566124	3.351512904456974e-62	***	E.
restrictions	Yes	74.32963889882015	2079.0	january2022	293.08999420566124	3.351512904456974e-62	***	E.
restrictions	Yes but more needs to be done	13.836253128351805	387.0	january2022	293.08999420566124	3.351512904456974e-62	***	E.
restrictions	No	11.834107972828027	331.0	january2022	293.08999420566124	3.351512904456974e-62	***	E.
government response	No	79.4780121558813	2223.0	december2020	38.87199480443232	3.622876902758375e-09	***	A.
government response	Yes	20.521987844118694	574.0	december2020	38.87199480443232	3.622876902758375e-09	***	A.
government response	No	79.621022524133	2227.0	june2021	38.87199480443232	3.622876902758375e-09	***	A.
government response	Yes	20.378977475867	570.0	june2021	38.87199480443232	3.622876902758375e-09	***	A.
government response	No	73.52415026833631	2055.0	january2022	38.87199480443232	3.622876902758375e-09	***	A.
government response	Yes	26.47584973166369	740.0	january2022	38.87199480443232	3.622876902758375e-09	***	A.
media hiding	No	86.12799427958527	2409.0	december2020	12.394502874772119	0.00203501632626308	**	B.
media hiding	Yes	13.872005720414732	388.0	december2020	12.394502874772119	0.00203501632626308	**	B.
media hiding	No	85.77046835895601	2399.0	june2021	12.394502874772119	0.00203501632626308	**	B.
media hiding	Yes	14.229531641043975	398.0	june2021	12.394502874772119	0.00203501632626308	**	B.
media hiding	No	83.05327136217377	2323.0	january2022	12.394502874772119	0.00203501632626308	**	B.
media hiding	Yes	16.946728637826244	474.0	january2022	12.394502874772119	0.00203501632626308	**	B.
vaccines	Yes	95.99570968895245	2685.0	december2020	49.253120734995505	2.0175333581751503e-11	***	C.
vaccines	No	4.004290311047551	112.0	december2020	49.253120734995505	2.0175333581751503e-11	***	C.
vaccines	Yes	98.46263854129423	2754.0	june2021	49.253120734995505	2.0175333581751503e-11	***	C.
vaccines	No	1.5373614587057562	43.0	june2021	49.253120734995505	2.0175333581751503e-11	***	C.
vaccines	Yes	98.46263854129423	2754.0	january2022	49.253120734995505	2.0175333581751503e-11	***	C.
vaccines	No	1.5373614587057562	43.0	january2022	49.253120734995505	2.0175333581751503e-11	***	C.
followed guidelines	Yes	64.81944941008223	1813.0	december2020	122.64898529889696	4.52387438042476e-24	***	H.
followed guidelines	Yes most of the time	34.07222023596711	953.0	december2020	122.64898529889696	4.52387438042476e-24	***	H.
followed guidelines	I used to but I've given up	0.7508044333214158	21.0	december2020	122.64898529889696	4.52387438042476e-24	***	H.
followed guidelines	No	0.3575259206292456	10.0	december2020	122.64898529889696	4.52387438042476e-24	***	H.
followed guidelines	Yes	62.06649982123704	1736.0	june2021	122.64898529889696	4.52387438042476e-24	***	H.
followed guidelines	Yes most of the time	35.00178762960314	979.0	june2021	122.64898529889696	4.52387438042476e-24	***	H.
followed guidelines	I used to but I've given up	2.3954236682159458	67.0	june2021	122.64898529889696	4.52387438042476e-24	***	H.
followed guidelines	No	0.5362888809438684	15.0	june2021	122.64898529889696	4.52387438042476e-24	***	H.
followed guidelines	Yes	53.91490883089025	1508.0	january2022	122.64898529889696	4.52387438042476e-24	***	H.
followed guidelines	Yes most of the time	41.294243832677864	1155.0	january2022	122.64898529889696	4.52387438042476e-24	***	H.
followed guidelines	I used to but I've given up	4.183053271362174	117.0	january2022	122.64898529889696	4.52387438042476e-24	***	H.
followed guidelines	No	0.6077940650697176	17.0	january2022	122.64898529889696	4.52387438042476e-24	***	H.
covid origins	Yes	79.35599284436493	2218.0	december2020	63.814974764057354	1.3891664901220178e-14	***	D.
covid origins	No	20.644007155635066	577.0	december2020	63.814974764057354	1.3891664901220178e-14	***	D.
covid origins	Yes	70.87656529516994	1981.0	june2021	63.814974764057354	1.3891664901220178e-14	***	D.
covid origins	No	29.12343470483005	814.0	june2021	63.814974764057354	1.3891664901220178e-14	***	D.
covid origins	Yes	71.6481944941008	2004.0	january2022	63.814974764057354	1.3891664901220178e-14	***	D.
covid origins	No	28.351805505899183	793.0	january2022	63.814974764057354	1.3891664901220178e-14	***	D.
leaving the house	No	36.467643904183056	1020.0	december2020	1181.8670391629441	1.1741436137584353e-247	***	I.
leaving the house	Yes - I dont trust others to be sensible	24.955309259921346	698.0	december2020	1181.8670391629441	1.1741436137584353e-247	***	I.
leaving the house	No not anymore	17.554522702895962	491.0	december2020	1181.8670391629441	1.1741436137584353e-247	***	I.
leaving the house	Yes - For other reasons	9.653199856989632	270.0	december2020	1181.8670391629441	1.1741436137584353e-247	***	I.
leaving the house	Yes - I am scared for my health	6.471219163389347	181.0	december2020	1181.8670391629441	1.1741436137584353e-247	***	I.
leaving the house	Yes - I am shielding	4.898105112620665	137.0	december2020	1181.8670391629441	1.1741436137584353e-247	***	I.
leaving the house	No	31.56953879156239	883.0	june2021	1181.8670391629441	1.1741436137584353e-247	***	I.
leaving the house	Yes - I dont trust others to be sensible	9.79621022524133	274.0	june2021	1181.8670391629441	1.1741436137584353e-247	***	I.
leaving the house	No not anymore	51.62674293886307	1444.0	june2021	1181.8670391629441	1.1741436137584353e-247	***	I.
leaving the house	Yes - For other reasons	3.9327851269217016	110.0	june2021	1181.8670391629441	1.1741436137584353e-247	***	I.
leaving the house	Yes - I am scared for my health	1.3228459063282088	37.0	june2021	1181.8670391629441	1.1741436137584353e-247	***	I.
leaving the house	Yes - I am shielding	1.7518770110833035	49.0	june2021	1181.8670391629441	1.1741436137584353e-247	***	I.
leaving the house	No	36.539149088308896	1022.0	january2022	1181.8670391629441	1.1741436137584353e-247	***	I.
leaving the house	Yes - I dont trust others to be sensible	8.294601358598499	232.0	january2022	1181.8670391629441	1.1741436137584353e-247	***	I.
leaving the house	No not anymore	48.44476224526279	1355.0	january2022	1181.8670391629441	1.1741436137584353e-247	***	I.
leaving the house	Yes - For other reasons	3.28923846978906	92.0	january2022	1181.8670391629441	1.1741436137584353e-247	***	I.
leaving the house	Yes - I am scared for my health	1.9663925634608508	55.0	january2022	1181.8670391629441	1.1741436137584353e-247	***	I.
leaving the house	Yes - I am shielding	1.465856274579907	41.0	january2022	1181.8670391629441	1.1741436137584353e-247	***	I.
covid19 app	yes	67.16573816155989	1929.0	december2020	69.61046508876225	4.914520982680351e-13	***	G.
covid19 app	no it doesnt work on my phone	14.658774373259053	421.0	december2020	69.61046508876225	4.914520982680351e-13	***	G.
covid19 app	no i dont want to be tracked	9.993036211699163	287.0	december2020	69.61046508876225	4.914520982680351e-13	***	G.
covid19 app	no i dont trust what the government will do with that data	8.182451253481894	235.0	december2020	69.61046508876225	4.914520982680351e-13	***	G.
covid19 app	yes	71.61223071577484	2061.0	june2021	69.61046508876225	4.914520982680351e-13	***	G.
covid19 app	no it doesnt work on my phone	12.230715774843643	352.0	june2021	69.61046508876225	4.914520982680351e-13	***	G.
covid19 app	no i dont want to be tracked	9.381514940931204	270.0	june2021	69.61046508876225	4.914520982680351e-13	***	G.
covid19 app	no i dont trust what the government will do with that data	6.775538568450313	195.0	june2021	69.61046508876225	4.914520982680351e-13	***	G.
covid19 app	yes	69.35146443514644	1989.0	january2022	69.61046508876225	4.914520982680351e-13	***	G.
covid19 app	no it doesnt work on my phone	9.86750348675035	283.0	january2022	69.61046508876225	4.914520982680351e-13	***	G.
covid19 app	no i dont want to be tracked	14.051603905160393	403.0	january2022	69.61046508876225	4.914520982680351e-13	***	G.
covid19 app	no i dont trust what the government will do with that data	6.729428172942817	193.0	january2022	69.61046508876225	4.914520982680351e-13	***	G.
information sources	tv news	28.946327311090602	2195.0	december2020	78.75668797260798	2.4688844968599082e-14	***	J.
information sources	internet news sites	19.95252538573124	1513.0	december2020	78.75668797260798	2.4688844968599082e-14	***	J.
information sources	governmental communications	13.556639852301199	1028.0	december2020	78.75668797260798	2.4688844968599082e-14	***	J.
information sources	radio	14.268759066332589	1082.0	december2020	78.75668797260798	2.4688844968599082e-14	***	J.
information sources	newspapers	12.514835816958987	949.0	december2020	78.75668797260798	2.4688844968599082e-14	***	J.
information sources	social media	5.4200184623499945	411.0	december2020	78.75668797260798	2.4688844968599082e-14	***	J.
information sources	word of mouth	3.8507187129104574	292.0	december2020	78.75668797260798	2.4688844968599082e-14	***	J.
information sources	podcasts	1.4901753923249377	113.0	december2020	78.75668797260798	2.4688844968599082e-14	***	J.
information sources	tv news	28.24910938118485	2141.0	june2021	78.75668797260798	2.4688844968599082e-14	***	J.
information sources	internet news sites	18.102652064916214	1372.0	june2021	78.75668797260798	2.4688844968599082e-14	***	J.
information sources	governmental communications	18.23459559308616	1382.0	june2021	78.75668797260798	2.4688844968599082e-14	***	J.
information sources	radio	12.640189998680565	958.0	june2021	78.75668797260798	2.4688844968599082e-14	***	J.
information sources	newspapers	12.429080353608654	942.0	june2021	78.75668797260798	2.4688844968599082e-14	***	J.
information sources	social media	4.446496899327088	337.0	june2021	78.75668797260798	2.4688844968599082e-14	***	J.
information sources	word of mouth	3.971500197915293	301.0	june2021	78.75668797260798	2.4688844968599082e-14	***	J.
information sources	podcasts	1.926375511281172	146.0	june2021	78.75668797260798	2.4688844968599082e-14	***	J.
