# Supplementary material for: Who and why: a study of British distrust in the government and media during the COVID-19 pandemic
Source: Research Square preprint supplement (doi:10.21203/rs.3.rs-1564442/v1), 2022-04-18
Supplement: Supplementary file 4 [file fe02960bab5c9a8ca045f10d.csv]

predictor	odds_ratios	p_values	factor	question	p_stars
18-30	1.5173918770796746	5.210292491700463e-11	Age	Government has ulterior motives	***
31-40	1.2458903294257522	0.0001834853364164696	Age	Government has ulterior motives	***
41-50	1.019023898972068	0.7421742139092754	Age	Government has ulterior motives	0.7421742139092754
61-70	0.9947904097617883	0.9363660386655615	Age	Government has ulterior motives	0.9363660386655615
>70	0.9854479589654296	0.8759012394260568	Age	Government has ulterior motives	0.8759012394260568
Male	0.9084202368714417	0.008071320637436909	Sex	Government has ulterior motives	**
Other	2.0380921512256864	0.000759347999904834	Sex	Government has ulterior motives	***
Abroad	0.8234326615613606	0.008042003759177721	Residence	Government has ulterior motives	**
East Asian	1.2608529677003806	0.0485131098102318	Ethnicity	Government has ulterior motives	*
Indian/South/ South East Asian	1.3443636430016745	0.008170431240105394	Ethnicity	Government has ulterior motives	**
Mixed	0.9320599968738255	0.5494180605578806	Ethnicity	Government has ulterior motives	0.5494180605578806
Other	1.478066096522024	0.030397802737896194	Ethnicity	Government has ulterior motives	*
Unknown	1.2534411534021	0.28546982307148616	Ethnicity	Government has ulterior motives	0.28546982307148616
PhD	0.9520441713441655	0.5378865477360102	Education	Government has ulterior motives	0.5378865477360102
Primary/ Elementary School or less	1.0119340270941104	0.9345248597488494	Education	Government has ulterior motives	0.9345248597488494
Secondary/ High School	0.8715867587920915	0.0005220101860116624	Education	Government has ulterior motives	***
Homemaker	0.9778407399986044	0.8463761572186864	Occupation	Government has ulterior motives	0.8463761572186864
Retired	1.0017491444943554	0.9790243606588868	Occupation	Government has ulterior motives	0.9790243606588868
Student	1.2210477394228039	0.008420543871107982	Occupation	Government has ulterior motives	**
Unemployed/ Looking	1.1547912707929453	0.11764501226200898	Occupation	Government has ulterior motives	0.11764501226200898
Unknown	1.4787263225538874	0.09674526894750916	Occupation	Government has ulterior motives	0.09674526894750916
Disabled/ Sheltered	0.8679453239736581	0.39449328225452873	Occupation	Government has ulterior motives	0.39449328225452873
Neurological condition	1.1478737067301246	0.16492354725943326	Neurological and/or Psychiatric conditions	Government has ulterior motives	0.16492354725943326
Psychiatric condition	1.194547080889145	0.0025172241877179434	Neurological and/or Psychiatric conditions	Government has ulterior motives	**
Neurological & Psychiatric	1.0846019361644157	0.6858840573087139	Neurological and/or Psychiatric conditions	Government has ulterior motives	0.6858840573087139
Unknown use	1.1569514216055066	0.0005758222472105395	Drug use frequency	Government has ulterior motives	***
Less than yearly	1.4286626522920016	4.535997153940448e-10	Drug use frequency	Government has ulterior motives	***
Yearly	1.6183100638879178	3.895402446038371e-09	Drug use frequency	Government has ulterior motives	***
Monthly	1.4660919099898766	0.001058043709555195	Drug use frequency	Government has ulterior motives	**
Weekly	1.741353518745082	0.00010933630501468572	Drug use frequency	Government has ulterior motives	***
Daily	1.9005968816449554	1.4437528922194323e-05	Drug use frequency	Government has ulterior motives	***
Internet news sites	0.9999677737656815	0.9993061879088486	News source	Government has ulterior motives	0.9993061879088486
Governmental communications	0.8956512047038013	0.003213008078312597	News source	Government has ulterior motives	**
Radio	0.968976267577458	0.40672764291118757	News source	Government has ulterior motives	0.40672764291118757
Newspapers	1.1506203154794648	0.0003549329762728458	News source	Government has ulterior motives	***
Social media	1.4131615767429164	5.217389849066176e-16	News source	Government has ulterior motives	***
Word of mouth	1.2465548863861184	5.377970129181218e-06	News source	Government has ulterior motives	***
Podcasts	1.209267609888042	0.00975958912347143	News source	Government has ulterior motives	**
Medium	1.337906049179206	5.967413764427308e-14	Wellbeing	Government has ulterior motives	***
Low	1.7113137405583672	1.0876610410007675e-15	Wellbeing	Government has ulterior motives	***
<2h	0.8859888629391067	0.018380320091985734	Hours online	Government has ulterior motives	*
4-6h	0.9908607030405485	0.8534689874850209	Hours online	Government has ulterior motives	0.8534689874850209
6-8h	0.9992665896749957	0.9900190575562702	Hours online	Government has ulterior motives	0.9900190575562702
8-10h	1.065518934976284	0.3469833269714745	Hours online	Government has ulterior motives	0.3469833269714745
10-14h	1.2050190928041156	0.019324761985738834	Hours online	Government has ulterior motives	*
>14h	0.9784022034457207	0.8603262335691387	Hours online	Government has ulterior motives	0.8603262335691387
51-60 - REF	1.0	REFERENCE	Age	Government has ulterior motives	REFERENCE
Female - REF	1.0	REFERENCE	Sex	Government has ulterior motives	REFERENCE
United Kingdom - REF	1.0	REFERENCE	Residence	Government has ulterior motives	REFERENCE
White European/ North American - REF	1.0	REFERENCE	Ethnicity	Government has ulterior motives	REFERENCE
University Degree - REF	1.0	REFERENCE	Education	Government has ulterior motives	REFERENCE
Worker - REF	1.0	REFERENCE	Occupation	Government has ulterior motives	REFERENCE
None - REF	1.0	REFERENCE	Neurological and/or Psychiatric conditions	Government has ulterior motives	REFERENCE
Never used - REF	1.0	REFERENCE	Drug use frequency	Government has ulterior motives	REFERENCE
TV - REF	1.0	REFERENCE	News source	Government has ulterior motives	REFERENCE
High - REF	1.0	REFERENCE	Wellbeing	Government has ulterior motives	REFERENCE
2-4h - REF	1.0	REFERENCE	Hours online	Government has ulterior motives	REFERENCE
18-30	1.4951043904985508	1.3419790685255239e-08	Age	Media is hiding things	***
31-40	1.2375746648412786	0.0012621421802687016	Age	Media is hiding things	**
41-50	1.1750875197670474	0.010610031059899475	Age	Media is hiding things	*
61-70	1.121119419864228	0.1189735722135504	Age	Media is hiding things	0.1189735722135504
>70	1.0971953447127114	0.388279855680258	Age	Media is hiding things	0.388279855680258
Male	0.9642642000836172	0.3687820022695498	Sex	Media is hiding things	0.3687820022695498
Other	1.5763485465209623	0.0459305335742193	Sex	Media is hiding things	*
Abroad	0.8967413688348582	0.1820837066295955	Residence	Media is hiding things	0.1820837066295955
East Asian	1.0323664917070612	0.8134482557330877	Ethnicity	Media is hiding things	0.8134482557330877
Indian/South/ South East Asian	1.2081108083044552	0.13061761362651067	Ethnicity	Media is hiding things	0.13061761362651067
Mixed	1.0914100429946751	0.4838868503836158	Ethnicity	Media is hiding things	0.4838868503836158
Other	0.963378742496751	0.866434187246079	Ethnicity	Media is hiding things	0.866434187246079
Unknown	1.6863873900427255	0.015405749237322582	Ethnicity	Media is hiding things	*
PhD	0.6865100281007449	0.0002514990687222257	Education	Media is hiding things	***
Primary/ Elementary School or less	1.899955690058545	3.912332307011855e-06	Education	Media is hiding things	***
Secondary/ High School	1.242278094365114	3.570424778578706e-07	Education	Media is hiding things	***
Homemaker	1.1133187177274482	0.37722313433776	Occupation	Media is hiding things	0.37722313433776
Retired	0.8515582078513796	0.03258543851459779	Occupation	Media is hiding things	*
Student	0.9463860863410838	0.5148883108805902	Occupation	Media is hiding things	0.5148883108805902
Unemployed/ Looking	1.2163173716840088	0.046800355983816086	Occupation	Media is hiding things	*
Unknown	0.8917262910836228	0.6939240068081882	Occupation	Media is hiding things	0.6939240068081882
Disabled/ Sheltered	1.1763633509157794	0.33255064479417684	Occupation	Media is hiding things	0.33255064479417684
Neurological condition	1.422698016532631	0.0006103394802793261	Neurological and/or Psychiatric conditions	Media is hiding things	***
Psychiatric condition	0.8911916932888468	0.08895943203504642	Neurological and/or Psychiatric conditions	Media is hiding things	0.08895943203504642
Neurological & Psychiatric	0.9288164036511853	0.7335583234744623	Neurological and/or Psychiatric conditions	Media is hiding things	0.7335583234744623
Unknown use	1.0569769311875001	0.24105969281731465	Drug use frequency	Media is hiding things	0.24105969281731465
Less than yearly	1.0733137924956453	0.28533325517027763	Drug use frequency	Media is hiding things	0.28533325517027763
Yearly	1.08607494670659	0.3831573301945286	Drug use frequency	Media is hiding things	0.3831573301945286
Monthly	1.366392171026128	0.0131157245583069	Drug use frequency	Media is hiding things	*
Weekly	1.973670272485198	3.7985081563341554e-06	Drug use frequency	Media is hiding things	***
Daily	2.0783547700883536	1.5660466606371534e-06	Drug use frequency	Media is hiding things	***
Internet news sites	1.0051508849129125	0.9010506708540154	News source	Media is hiding things	0.9010506708540154
Governmental communications	1.005869492851041	0.8875670113766073	News source	Media is hiding things	0.8875670113766073
Radio	0.9181417086451843	0.0457041923495169	News source	Media is hiding things	*
Newspapers	0.9141566598062221	0.04652603421395852	News source	Media is hiding things	*
Social media	1.550359462523394	3.602593245309005e-21	News source	Media is hiding things	***
Word of mouth	1.4922714153709176	1.0064706077721918e-14	News source	Media is hiding things	***
Podcasts	1.3089405907708078	0.0008089137515091615	News source	Media is hiding things	***
Medium	1.3490322964905126	4.027014451282295e-12	Wellbeing	Media is hiding things	***
Low	1.774501614803754	3.4729032747734686e-15	Wellbeing	Media is hiding things	***
<2h	0.9178117097452816	0.13415416442531705	Hours online	Media is hiding things	0.13415416442531705
4-6h	0.9865275523694409	0.8059786490528236	Hours online	Media is hiding things	0.8059786490528236
6-8h	1.093960628858894	0.16050803987717177	Hours online	Media is hiding things	0.16050803987717177
8-10h	0.8719506461151758	0.07895695916607479	Hours online	Media is hiding things	0.07895695916607479
10-14h	0.8811433658716987	0.1724965494013162	Hours online	Media is hiding things	0.1724965494013162
>14h	1.3323420560964925	0.02378964401713447	Hours online	Media is hiding things	*
51-60 - REF	1.0	REFERENCE	Age	Media is hiding things	REFERENCE
Female - REF	1.0	REFERENCE	Sex	Media is hiding things	REFERENCE
United Kingdom - REF	1.0	REFERENCE	Residence	Media is hiding things	REFERENCE
White European/ North American - REF	1.0	REFERENCE	Ethnicity	Media is hiding things	REFERENCE
University Degree - REF	1.0	REFERENCE	Education	Media is hiding things	REFERENCE
Worker - REF	1.0	REFERENCE	Occupation	Media is hiding things	REFERENCE
None - REF	1.0	REFERENCE	Neurological and/or Psychiatric conditions	Media is hiding things	REFERENCE
Never used - REF	1.0	REFERENCE	Drug use frequency	Media is hiding things	REFERENCE
TV - REF	1.0	REFERENCE	News source	Media is hiding things	REFERENCE
High - REF	1.0	REFERENCE	Wellbeing	Media is hiding things	REFERENCE
2-4h - REF	1.0	REFERENCE	Hours online	Media is hiding things	REFERENCE
18-30	1.4555060299652671	0.00041504985258799095	Age	Refusal of the vaccine	***
31-40	1.7377139243610351	2.4922677687824905e-09	Age	Refusal of the vaccine	***
41-50	1.4652900500327397	1.6386735130648618e-05	Age	Refusal of the vaccine	***
61-70	0.6281737483869321	0.00021906305742467791	Age	Refusal of the vaccine	***
>70	0.4655475936612267	0.00041374466540694055	Age	Refusal of the vaccine	***
Male	0.8011670627998778	0.0003385672161376408	Sex	Refusal of the vaccine	***
Other	0.8613454397663244	0.7004316413347468	Sex	Refusal of the vaccine	0.7004316413347468
Abroad	1.4304739517562477	0.000636927336504266	Residence	Refusal of the vaccine	***
East Asian	1.5505618925254827	0.011612261527777652	Ethnicity	Refusal of the vaccine	*
Indian/South/ South East Asian	2.1243629007113958	6.037687604594924e-07	Ethnicity	Refusal of the vaccine	***
Mixed	1.9201291560986062	1.3280413981889301e-05	Ethnicity	Refusal of the vaccine	***
Other	3.018298211016862	6.718552777704873e-07	Ethnicity	Refusal of the vaccine	***
Unknown	1.7290363613100896	0.05206635211948396	Ethnicity	Refusal of the vaccine	0.05206635211948396
PhD	0.7001924323604732	0.030637245739024984	Education	Refusal of the vaccine	*
Primary/ Elementary School or less	2.2486164978926366	6.167210664437238e-05	Education	Refusal of the vaccine	***
Secondary/ High School	1.6689145530454943	7.311295937658466e-16	Education	Refusal of the vaccine	***
Homemaker	1.186050816038312	0.28710760827806303	Occupation	Refusal of the vaccine	0.28710760827806303
Retired	0.6649437500395531	0.0020829210658050872	Occupation	Refusal of the vaccine	**
Student	0.6611944646411843	0.0027188365443846737	Occupation	Refusal of the vaccine	**
Unemployed/ Looking	1.5441551649266065	0.000724832510517623	Occupation	Refusal of the vaccine	***
Unknown	2.75412027550579	0.00048390560220318366	Occupation	Refusal of the vaccine	***
Disabled/ Sheltered	1.7928386905948193	0.007297820622609136	Occupation	Refusal of the vaccine	**
Neurological condition	0.9015045850126475	0.5557505228284266	Neurological and/or Psychiatric conditions	Refusal of the vaccine	0.5557505228284266
Psychiatric condition	0.7843980956993641	0.023507409947009672	Neurological and/or Psychiatric conditions	Refusal of the vaccine	*
Neurological & Psychiatric	0.994949337104167	0.9866942756792334	Neurological and/or Psychiatric conditions	Refusal of the vaccine	0.9866942756792334
Unknown use	1.238368255330532	0.0021563541207827667	Drug use frequency	Refusal of the vaccine	**
Less than yearly	1.0925797996840558	0.38078687130638533	Drug use frequency	Refusal of the vaccine	0.38078687130638533
Yearly	0.999615536822523	0.9978962649020766	Drug use frequency	Refusal of the vaccine	0.9978962649020766
Monthly	0.9841796553931564	0.9380210657818052	Drug use frequency	Refusal of the vaccine	0.9380210657818052
Weekly	1.3922688006194126	0.1459637011720094	Drug use frequency	Refusal of the vaccine	0.1459637011720094
Daily	1.7798252342644183	0.007183920871712041	Drug use frequency	Refusal of the vaccine	**
Internet news sites	0.8797970812029731	0.03840593716859871	News source	Refusal of the vaccine	*
Governmental communications	0.8335717305540937	0.004423380045439127	News source	Refusal of the vaccine	**
Radio	0.7603617895121353	5.3034820685090924e-05	News source	Refusal of the vaccine	***
Newspapers	1.0030333097203261	0.9651626509305127	News source	Refusal of the vaccine	0.9651626509305127
Social media	1.092662127455947	0.2184109994783594	News source	Refusal of the vaccine	0.2184109994783594
Word of mouth	1.7060711709930243	9.18851464352385e-13	News source	Refusal of the vaccine	***
Podcasts	1.5726310660146672	5.7812802160916164e-05	News source	Refusal of the vaccine	***
Medium	0.870825590857709	0.03689411675693473	Wellbeing	Refusal of the vaccine	*
Low	1.2161050551816734	0.06923885108345539	Wellbeing	Refusal of the vaccine	0.06923885108345539
<2h	1.0293116063732581	0.7370043415426117	Hours online	Refusal of the vaccine	0.7370043415426117
4-6h	0.9842128401991014	0.8475212933051501	Hours online	Refusal of the vaccine	0.8475212933051501
6-8h	0.9479096960841941	0.5849635475676784	Hours online	Refusal of the vaccine	0.5849635475676784
8-10h	0.8387539106034898	0.132412540143198	Hours online	Refusal of the vaccine	0.132412540143198
10-14h	0.7370894396449298	0.0357430769549069	Hours online	Refusal of the vaccine	*
>14h	1.0323469519874957	0.8694313148024503	Hours online	Refusal of the vaccine	0.8694313148024503
51-60 - REF	1.0	REFERENCE	Age	Refusal of the vaccine	REFERENCE
Female - REF	1.0	REFERENCE	Sex	Refusal of the vaccine	REFERENCE
United Kingdom - REF	1.0	REFERENCE	Residence	Refusal of the vaccine	REFERENCE
White European/ North American - REF	1.0	REFERENCE	Ethnicity	Refusal of the vaccine	REFERENCE
University Degree - REF	1.0	REFERENCE	Education	Refusal of the vaccine	REFERENCE
Worker - REF	1.0	REFERENCE	Occupation	Refusal of the vaccine	REFERENCE
None - REF	1.0	REFERENCE	Neurological and/or Psychiatric conditions	Refusal of the vaccine	REFERENCE
Never used - REF	1.0	REFERENCE	Drug use frequency	Refusal of the vaccine	REFERENCE
TV - REF	1.0	REFERENCE	News source	Refusal of the vaccine	REFERENCE
High - REF	1.0	REFERENCE	Wellbeing	Refusal of the vaccine	REFERENCE
2-4h - REF	1.0	REFERENCE	Hours online	Refusal of the vaccine	REFERENCE
18-30	0.670391464322332	1.227088669089697e-07	Age	COVID-19 has unnatural origins	***
31-40	0.8426705138764455	0.007808799614823714	Age	COVID-19 has unnatural origins	**
41-50	0.985498664411389	0.8004819209355609	Age	COVID-19 has unnatural origins	0.8004819209355609
61-70	1.0152358013412124	0.8099171702835674	Age	COVID-19 has unnatural origins	0.8099171702835674
>70	1.056827942613187	0.5271614175180084	Age	COVID-19 has unnatural origins	0.5271614175180084
Male	0.7504730981340065	6.651104278232069e-14	Sex	COVID-19 has unnatural origins	***
Other	0.9811602684646425	0.9403904533187086	Sex	COVID-19 has unnatural origins	0.9403904533187086
Abroad	0.9816195771020617	0.8058391806675997	Residence	COVID-19 has unnatural origins	0.8058391806675997
East Asian	1.0108163340308376	0.9379882324282778	Ethnicity	COVID-19 has unnatural origins	0.9379882324282778
Indian/South/ South East Asian	1.804402892079931	7.443390395106249e-07	Ethnicity	COVID-19 has unnatural origins	***
Mixed	1.2660501161261413	0.060871971807891875	Ethnicity	COVID-19 has unnatural origins	0.060871971807891875
Other	2.0708844929094155	0.00012153690891079284	Ethnicity	COVID-19 has unnatural origins	***
Unknown	1.3217400633890144	0.19293030383034837	Ethnicity	COVID-19 has unnatural origins	0.19293030383034837
PhD	0.4955803283030181	1.884047952985315e-09	Education	COVID-19 has unnatural origins	***
Primary/ Elementary School or less	3.619012484436155	1.9378633404511528e-26	Education	COVID-19 has unnatural origins	***
Secondary/ High School	1.8766035062782926	4.331765898842425e-59	Education	COVID-19 has unnatural origins	***
Homemaker	0.9798899355799588	0.8564094757744211	Occupation	COVID-19 has unnatural origins	0.8564094757744211
Retired	1.0213800646194997	0.7400225978502555	Occupation	COVID-19 has unnatural origins	0.7400225978502555
Student	0.6886701356817744	0.00034110512091132085	Occupation	COVID-19 has unnatural origins	***
Unemployed/ Looking	0.9848741466815752	0.8835931261076021	Occupation	COVID-19 has unnatural origins	0.8835931261076021
Unknown	0.8750260960954824	0.6235595556172662	Occupation	COVID-19 has unnatural origins	0.6235595556172662
Disabled/ Sheltered	1.1649118889289731	0.34746290107560474	Occupation	COVID-19 has unnatural origins	0.34746290107560474
Neurological condition	0.9590566224505225	0.6929435543473724	Neurological and/or Psychiatric conditions	COVID-19 has unnatural origins	0.6929435543473724
Psychiatric condition	0.8885074646271962	0.08688559511729754	Neurological and/or Psychiatric conditions	COVID-19 has unnatural origins	0.08688559511729754
Neurological & Psychiatric	0.8026329826776026	0.3399742918708275	Neurological and/or Psychiatric conditions	COVID-19 has unnatural origins	0.3399742918708275
Unknown use	0.9496312254769333	0.23688874619420863	Drug use frequency	COVID-19 has unnatural origins	0.23688874619420863
Less than yearly	0.7580351905499856	6.064266473449711e-05	Drug use frequency	COVID-19 has unnatural origins	***
Yearly	0.7214361069871401	0.0023296793544615234	Drug use frequency	COVID-19 has unnatural origins	**
Monthly	0.8202831155764452	0.18368519929871185	Drug use frequency	COVID-19 has unnatural origins	0.18368519929871185
Weekly	1.0702771118974876	0.6934522030606067	Drug use frequency	COVID-19 has unnatural origins	0.6934522030606067
Daily	1.2222047135687404	0.21661201628355398	Drug use frequency	COVID-19 has unnatural origins	0.21661201628355398
Internet news sites	0.7598707681068809	4.745812446803928e-13	News source	COVID-19 has unnatural origins	***
Governmental communications	0.9703160743011111	0.4455177350811883	News source	COVID-19 has unnatural origins	0.4455177350811883
Radio	0.7955346140497135	1.6836621720916133e-08	News source	COVID-19 has unnatural origins	***
Newspapers	0.9401285492913887	0.14215100484920554	News source	COVID-19 has unnatural origins	0.14215100484920554
Social media	1.085508893947342	0.09297364421850308	News source	COVID-19 has unnatural origins	0.09297364421850308
Word of mouth	1.3547084614270613	1.9631984830870316e-08	News source	COVID-19 has unnatural origins	***
Podcasts	1.00027218482993	0.9975691462270688	News source	COVID-19 has unnatural origins	0.9975691462270688
Medium	1.1491545272624284	0.0007847240583577912	Wellbeing	COVID-19 has unnatural origins	***
Low	1.5270405523992348	1.1712859581366169e-08	Wellbeing	COVID-19 has unnatural origins	***
<2h	0.9891508389336672	0.826184857706038	Hours online	COVID-19 has unnatural origins	0.826184857706038
4-6h	0.9754487005374642	0.638887748355242	Hours online	COVID-19 has unnatural origins	0.638887748355242
6-8h	1.004525103125673	0.9442183371655115	Hours online	COVID-19 has unnatural origins	0.9442183371655115
8-10h	0.9207695935442302	0.2876454542698309	Hours online	COVID-19 has unnatural origins	0.2876454542698309
10-14h	0.8513802340728206	0.09762917036554407	Hours online	COVID-19 has unnatural origins	0.09762917036554407
>14h	1.2616299097311092	0.06990286185734122	Hours online	COVID-19 has unnatural origins	0.06990286185734122
51-60 - REF	1.0	REFERENCE	Age	COVID-19 has unnatural origins	REFERENCE
Female - REF	1.0	REFERENCE	Sex	COVID-19 has unnatural origins	REFERENCE
United Kingdom - REF	1.0	REFERENCE	Residence	COVID-19 has unnatural origins	REFERENCE
White European/ North American - REF	1.0	REFERENCE	Ethnicity	COVID-19 has unnatural origins	REFERENCE
University Degree - REF	1.0	REFERENCE	Education	COVID-19 has unnatural origins	REFERENCE
Worker - REF	1.0	REFERENCE	Occupation	COVID-19 has unnatural origins	REFERENCE
None - REF	1.0	REFERENCE	Neurological and/or Psychiatric conditions	COVID-19 has unnatural origins	REFERENCE
Never used - REF	1.0	REFERENCE	Drug use frequency	COVID-19 has unnatural origins	REFERENCE
TV - REF	1.0	REFERENCE	News source	COVID-19 has unnatural origins	REFERENCE
High - REF	1.0	REFERENCE	Wellbeing	COVID-19 has unnatural origins	REFERENCE
2-4h - REF	1.0	REFERENCE	Hours online	COVID-19 has unnatural origins	REFERENCE
18-30	0.9772495102396389	0.7693575014617352	Age	Only wearing a mask when obliged/not at all	0.7693575014617352
31-40	1.142944097015288	0.04760027573981223	Age	Only wearing a mask when obliged/not at all	*
41-50	1.0282355264935394	0.6601878153926838	Age	Only wearing a mask when obliged/not at all	0.6601878153926838
61-70	0.7435770440000632	5.467254725421056e-05	Age	Only wearing a mask when obliged/not at all	***
>70	0.6632505939597779	0.00011365503339955998	Age	Only wearing a mask when obliged/not at all	***
Male	1.3756738688141699	4.690657663491371e-14	Sex	Only wearing a mask when obliged/not at all	***
Other	0.6625286419699377	0.24546375486101835	Sex	Only wearing a mask when obliged/not at all	0.24546375486101835
Abroad	1.0251745079142418	0.7604232400709849	Residence	Only wearing a mask when obliged/not at all	0.7604232400709849
East Asian	0.9942779124917243	0.9688421061150593	Ethnicity	Only wearing a mask when obliged/not at all	0.9688421061150593
Indian/South/ South East Asian	1.1155065820894805	0.42254534117457987	Ethnicity	Only wearing a mask when obliged/not at all	0.42254534117457987
Mixed	1.0369662625094345	0.7953308020017532	Ethnicity	Only wearing a mask when obliged/not at all	0.7953308020017532
Other	0.9922923823543537	0.9736979200468746	Ethnicity	Only wearing a mask when obliged/not at all	0.9736979200468746
Unknown	1.1222400321968486	0.6358780038929376	Ethnicity	Only wearing a mask when obliged/not at all	0.6358780038929376
PhD	0.7343829516067373	0.0033632906643940178	Education	Only wearing a mask when obliged/not at all	**
Primary/ Elementary School or less	1.4286368896621855	0.01793692386145464	Education	Only wearing a mask when obliged/not at all	*
Secondary/ High School	1.2413067323317555	1.07455151046495e-06	Education	Only wearing a mask when obliged/not at all	***
Homemaker	0.9748375274703511	0.8502549964175732	Occupation	Only wearing a mask when obliged/not at all	0.8502549964175732
Retired	0.9679630015459076	0.6623896490963301	Occupation	Only wearing a mask when obliged/not at all	0.6623896490963301
Student	0.9149989893120638	0.3887301098235403	Occupation	Only wearing a mask when obliged/not at all	0.3887301098235403
Unemployed/ Looking	1.1226048988274455	0.2841111414418226	Occupation	Only wearing a mask when obliged/not at all	0.2841111414418226
Unknown	0.8647302816128275	0.6433076096202152	Occupation	Only wearing a mask when obliged/not at all	0.6433076096202152
Disabled/ Sheltered	1.4279052645242118	0.04810860134054614	Occupation	Only wearing a mask when obliged/not at all	*
Neurological condition	0.9091382902696393	0.442125545100021	Neurological and/or Psychiatric conditions	Only wearing a mask when obliged/not at all	0.442125545100021
Psychiatric condition	0.8692217242595205	0.07100470617037931	Neurological and/or Psychiatric conditions	Only wearing a mask when obliged/not at all	0.07100470617037931
Neurological & Psychiatric	1.1422885465239756	0.5798001521880773	Neurological and/or Psychiatric conditions	Only wearing a mask when obliged/not at all	0.5798001521880773
Unknown use	0.9342889416810997	0.1623991584536858	Drug use frequency	Only wearing a mask when obliged/not at all	0.1623991584536858
Less than yearly	1.0265613142269927	0.7034765883558098	Drug use frequency	Only wearing a mask when obliged/not at all	0.7034765883558098
Yearly	0.7372223367034868	0.006072133826302081	Drug use frequency	Only wearing a mask when obliged/not at all	**
Monthly	0.8637210509786344	0.3351028738073566	Drug use frequency	Only wearing a mask when obliged/not at all	0.3351028738073566
Weekly	1.2573341852388078	0.1765059270502426	Drug use frequency	Only wearing a mask when obliged/not at all	0.1765059270502426
Daily	1.0293218567931208	0.873910404119826	Drug use frequency	Only wearing a mask when obliged/not at all	0.873910404119826
Internet news sites	0.9402726899354913	0.15083531897013314	News source	Only wearing a mask when obliged/not at all	0.15083531897013314
Governmental communications	0.6964012989333501	4.192329860737823e-16	News source	Only wearing a mask when obliged/not at all	***
Radio	0.918213449646043	0.055340270744331364	News source	Only wearing a mask when obliged/not at all	0.055340270744331364
Newspapers	1.134925995126889	0.006007408689021373	News source	Only wearing a mask when obliged/not at all	**
Social media	0.9277449845656285	0.1662553294331044	News source	Only wearing a mask when obliged/not at all	0.1662553294331044
Word of mouth	1.4921248692349978	2.3980259370351767e-12	News source	Only wearing a mask when obliged/not at all	***
Podcasts	1.0267622214090355	0.775369981525897	News source	Only wearing a mask when obliged/not at all	0.775369981525897
Medium	0.9984003052505626	0.9721617598528334	Wellbeing	Only wearing a mask when obliged/not at all	0.9721617598528334
Low	0.9551487982530111	0.5996278872434905	Wellbeing	Only wearing a mask when obliged/not at all	0.5996278872434905
<2h	1.0771722674449296	0.18382633214087674	Hours online	Only wearing a mask when obliged/not at all	0.18382633214087674
4-6h	0.9029801175910753	0.08565381258094408	Hours online	Only wearing a mask when obliged/not at all	0.08565381258094408
6-8h	0.9640937337362395	0.6000257769031594	Hours online	Only wearing a mask when obliged/not at all	0.6000257769031594
8-10h	0.9321204350487624	0.3936072374617724	Hours online	Only wearing a mask when obliged/not at all	0.3936072374617724
10-14h	0.7996022914772708	0.03288988962298291	Hours online	Only wearing a mask when obliged/not at all	*
>14h	1.3036201901084954	0.04761121493753629	Hours online	Only wearing a mask when obliged/not at all	*
51-60 - REF	1.0	REFERENCE	Age	Only wearing a mask when obliged/not at all	REFERENCE
Female - REF	1.0	REFERENCE	Sex	Only wearing a mask when obliged/not at all	REFERENCE
United Kingdom - REF	1.0	REFERENCE	Residence	Only wearing a mask when obliged/not at all	REFERENCE
White European/ North American - REF	1.0	REFERENCE	Ethnicity	Only wearing a mask when obliged/not at all	REFERENCE
University Degree - REF	1.0	REFERENCE	Education	Only wearing a mask when obliged/not at all	REFERENCE
Worker - REF	1.0	REFERENCE	Occupation	Only wearing a mask when obliged/not at all	REFERENCE
None - REF	1.0	REFERENCE	Neurological and/or Psychiatric conditions	Only wearing a mask when obliged/not at all	REFERENCE
Never used - REF	1.0	REFERENCE	Drug use frequency	Only wearing a mask when obliged/not at all	REFERENCE
TV - REF	1.0	REFERENCE	News source	Only wearing a mask when obliged/not at all	REFERENCE
High - REF	1.0	REFERENCE	Wellbeing	Only wearing a mask when obliged/not at all	REFERENCE
2-4h - REF	1.0	REFERENCE	Hours online	Only wearing a mask when obliged/not at all	REFERENCE
18-30	1.6739150470188948	5.859862526842168e-17	Age	Restrictions are justified but more needs doing	***
31-40	1.2323674812929493	0.00017100814086844113	Age	Restrictions are justified but more needs doing	***
41-50	1.0019828235426889	0.9701074135232873	Age	Restrictions are justified but more needs doing	0.9701074135232873
61-70	0.9945499739058116	0.9261888208473021	Age	Restrictions are justified but more needs doing	0.9261888208473021
>70	1.0551472333873606	0.5187651870141652	Age	Restrictions are justified but more needs doing	0.5187651870141652
Male	0.9181990116272178	0.01175756650948407	Sex	Restrictions are justified but more needs doing	*
Other	1.3505760781971765	0.1740177195211976	Sex	Restrictions are justified but more needs doing	0.1740177195211976
Abroad	0.6782099393798541	3.699005496323193e-08	Residence	Restrictions are justified but more needs doing	***
East Asian	1.2621216732889984	0.04198710020375616	Ethnicity	Restrictions are justified but more needs doing	*
Indian/South/ South East Asian	1.458609783606874	0.0006443756309436721	Ethnicity	Restrictions are justified but more needs doing	***
Mixed	1.3057536664301022	0.016113219010459194	Ethnicity	Restrictions are justified but more needs doing	*
Other	1.276450880136034	0.1748873790009401	Ethnicity	Restrictions are justified but more needs doing	0.1748873790009401
Unknown	0.9270312887875786	0.7259844730352709	Ethnicity	Restrictions are justified but more needs doing	0.7259844730352709
PhD	0.9575986042241442	0.5638672395662563	Education	Restrictions are justified but more needs doing	0.5638672395662563
Primary/ Elementary School or less	1.1104467065022776	0.4384669633878875	Education	Restrictions are justified but more needs doing	0.4384669633878875
Secondary/ High School	1.106896425656903	0.005357155099394665	Education	Restrictions are justified but more needs doing	**
Homemaker	0.9961634513041524	0.9711929269664455	Occupation	Restrictions are justified but more needs doing	0.9711929269664455
Retired	0.972623160609694	0.6429403308998722	Occupation	Restrictions are justified but more needs doing	0.6429403308998722
Student	1.1328511310821474	0.10725240477029288	Occupation	Restrictions are justified but more needs doing	0.10725240477029288
Unemployed/ Looking	1.1752715658076789	0.07323502821125083	Occupation	Restrictions are justified but more needs doing	0.07323502821125083
Unknown	0.8914402717601873	0.6489800060748505	Occupation	Restrictions are justified but more needs doing	0.6489800060748505
Disabled/ Sheltered	1.2526809553491838	0.13695210426658336	Occupation	Restrictions are justified but more needs doing	0.13695210426658336
Neurological condition	1.3030208319012768	0.003802133526987231	Neurological and/or Psychiatric conditions	Restrictions are justified but more needs doing	**
Psychiatric condition	1.210653301326334	0.0008606213060780585	Neurological and/or Psychiatric conditions	Restrictions are justified but more needs doing	***
Neurological & Psychiatric	1.9969635505957326	0.00029306751471610724	Neurological and/or Psychiatric conditions	Restrictions are justified but more needs doing	***
Unknown use	1.0040411995889391	0.9192388761887526	Drug use frequency	Restrictions are justified but more needs doing	0.9192388761887526
Less than yearly	1.16993522738522	0.004415943403639382	Drug use frequency	Restrictions are justified but more needs doing	**
Yearly	1.1175700250099576	0.18418781366468173	Drug use frequency	Restrictions are justified but more needs doing	0.18418781366468173
Monthly	0.8198700962868182	0.10535328457469992	Drug use frequency	Restrictions are justified but more needs doing	0.10535328457469992
Weekly	0.9837921867636009	0.9161575539998695	Drug use frequency	Restrictions are justified but more needs doing	0.9161575539998695
Daily	1.3123803579873887	0.07928280414463368	Drug use frequency	Restrictions are justified but more needs doing	0.07928280414463368
Internet news sites	1.1074340255709336	0.003236201394136744	News source	Restrictions are justified but more needs doing	**
Governmental communications	1.1476491368967552	7.097043090775e-05	News source	Restrictions are justified but more needs doing	***
Radio	1.1035979467595387	0.005089925309313063	News source	Restrictions are justified but more needs doing	**
Newspapers	0.9982936068717273	0.9635065695704874	News source	Restrictions are justified but more needs doing	0.9635065695704874
Social media	1.3366678844043918	3.4289665163136646e-12	News source	Restrictions are justified but more needs doing	***
Word of mouth	1.012259201589909	0.8018529556610354	News source	Restrictions are justified but more needs doing	0.8018529556610354
Podcasts	0.9822892759821102	0.8130978593542393	News source	Restrictions are justified but more needs doing	0.8130978593542393
Medium	1.2504132494679492	9.433390279661471e-10	Wellbeing	Restrictions are justified but more needs doing	***
Low	1.5917806847329827	2.2365628498414947e-12	Wellbeing	Restrictions are justified but more needs doing	***
<2h	0.9791525692022274	0.6513331055095655	Hours online	Restrictions are justified but more needs doing	0.6513331055095655
4-6h	1.0221010799353718	0.6416221383454206	Hours online	Restrictions are justified but more needs doing	0.6416221383454206
6-8h	1.110488616046494	0.059924079229765594	Hours online	Restrictions are justified but more needs doing	0.059924079229765594
8-10h	1.2843184742361435	8.763882992860116e-05	Hours online	Restrictions are justified but more needs doing	***
10-14h	1.4406832740855093	2.3711894441381897e-06	Hours online	Restrictions are justified but more needs doing	***
>14h	1.156427148542414	0.22667739647332563	Hours online	Restrictions are justified but more needs doing	0.22667739647332563
51-60 - REF	1.0	REFERENCE	Age	Restrictions are justified but more needs doing	REFERENCE
Female - REF	1.0	REFERENCE	Sex	Restrictions are justified but more needs doing	REFERENCE
United Kingdom - REF	1.0	REFERENCE	Residence	Restrictions are justified but more needs doing	REFERENCE
White European/ North American - REF	1.0	REFERENCE	Ethnicity	Restrictions are justified but more needs doing	REFERENCE
University Degree - REF	1.0	REFERENCE	Education	Restrictions are justified but more needs doing	REFERENCE
Worker - REF	1.0	REFERENCE	Occupation	Restrictions are justified but more needs doing	REFERENCE
None - REF	1.0	REFERENCE	Neurological and/or Psychiatric conditions	Restrictions are justified but more needs doing	REFERENCE
Never used - REF	1.0	REFERENCE	Drug use frequency	Restrictions are justified but more needs doing	REFERENCE
TV - REF	1.0	REFERENCE	News source	Restrictions are justified but more needs doing	REFERENCE
High - REF	1.0	REFERENCE	Wellbeing	Restrictions are justified but more needs doing	REFERENCE
2-4h - REF	1.0	REFERENCE	Hours online	Restrictions are justified but more needs doing	REFERENCE
18-30	1.8199519311750563	4.1360545810657716e-11	Age	Lockdown restrictions are unjustified	***
31-40	1.4672741293772873	2.7060194003949614e-06	Age	Lockdown restrictions are unjustified	***
41-50	1.053717640112662	0.5086612946375206	Age	Lockdown restrictions are unjustified	0.5086612946375206
61-70	0.7469071658961515	0.0020349676399746075	Age	Lockdown restrictions are unjustified	**
>70	0.6140630980542222	0.0007250298013289627	Age	Lockdown restrictions are unjustified	***
Male	1.2589867918880369	9.344315687338179e-06	Sex	Lockdown restrictions are unjustified	***
Other	1.12738152195634	0.7483614752819928	Sex	Lockdown restrictions are unjustified	0.7483614752819928
Abroad	0.7049530836009134	0.001096436936005445	Residence	Lockdown restrictions are unjustified	**
East Asian	1.1864023761623619	0.3178928856517045	Ethnicity	Lockdown restrictions are unjustified	0.3178928856517045
Indian/South/ South East Asian	1.119683418070424	0.5060772573242123	Ethnicity	Lockdown restrictions are unjustified	0.5060772573242123
Mixed	1.1666619066957509	0.34740053670013726	Ethnicity	Lockdown restrictions are unjustified	0.34740053670013726
Other	0.9538613578916704	0.8728202828767692	Ethnicity	Lockdown restrictions are unjustified	0.8728202828767692
Unknown	1.0024082565290018	0.9937525781357112	Ethnicity	Lockdown restrictions are unjustified	0.9937525781357112
PhD	0.8238630583670863	0.11630865720979669	Education	Lockdown restrictions are unjustified	0.11630865720979669
Primary/ Elementary School or less	1.4312091309697612	0.0630659835619087	Education	Lockdown restrictions are unjustified	0.0630659835619087
Secondary/ High School	1.3221068691685616	3.456626653818254e-07	Education	Lockdown restrictions are unjustified	***
Homemaker	0.8582135245101487	0.3761272415461614	Occupation	Lockdown restrictions are unjustified	0.3761272415461614
Retired	0.8199525705549444	0.040382147262434144	Occupation	Lockdown restrictions are unjustified	*
Student	0.9458351639811667	0.6281226670911194	Occupation	Lockdown restrictions are unjustified	0.6281226670911194
Unemployed/ Looking	1.18034633358299	0.19674580630073335	Occupation	Lockdown restrictions are unjustified	0.19674580630073335
Unknown	1.333574337457862	0.37499883682065327	Occupation	Lockdown restrictions are unjustified	0.37499883682065327
Disabled/ Sheltered	1.034239936834135	0.8970900705970319	Occupation	Lockdown restrictions are unjustified	0.8970900705970319
Neurological condition	0.7895922427670939	0.15974551235173695	Neurological and/or Psychiatric conditions	Lockdown restrictions are unjustified	0.15974551235173695
Psychiatric condition	0.87208626581886	0.14798594012964184	Neurological and/or Psychiatric conditions	Lockdown restrictions are unjustified	0.14798594012964184
Neurological & Psychiatric	0.7119276558404994	0.38297219651486547	Neurological and/or Psychiatric conditions	Lockdown restrictions are unjustified	0.38297219651486547
Unknown use	1.0449088744919686	0.46213206227886505	Drug use frequency	Lockdown restrictions are unjustified	0.46213206227886505
Less than yearly	1.117330071640355	0.19322262574749716	Drug use frequency	Lockdown restrictions are unjustified	0.19322262574749716
Yearly	1.1583938372067952	0.21568412087198152	Drug use frequency	Lockdown restrictions are unjustified	0.21568412087198152
Monthly	0.9449010619425713	0.7408078840632388	Drug use frequency	Lockdown restrictions are unjustified	0.7408078840632388
Weekly	1.5559241011635243	0.020417129538972636	Drug use frequency	Lockdown restrictions are unjustified	*
Daily	1.7674298406611968	0.004568552897601015	Drug use frequency	Lockdown restrictions are unjustified	**
Internet news sites	0.9881716570840596	0.8218408359240724	News source	Lockdown restrictions are unjustified	0.8218408359240724
Governmental communications	0.699784067752631	8.079985889106976e-11	News source	Lockdown restrictions are unjustified	***
Radio	0.8955092846380546	0.04537100857126894	News source	Lockdown restrictions are unjustified	*
Newspapers	1.392806565746318	2.388626871734539e-09	News source	Lockdown restrictions are unjustified	***
Social media	1.207584586099204	0.002830398721719051	News source	Lockdown restrictions are unjustified	**
Word of mouth	1.3700631937458783	4.086499431486208e-06	News source	Lockdown restrictions are unjustified	***
Podcasts	1.6216574802605201	5.75693624204531e-07	News source	Lockdown restrictions are unjustified	***
Medium	1.0770491185150062	0.18429419856283114	Wellbeing	Lockdown restrictions are unjustified	0.18429419856283114
Low	1.2384408205293125	0.03933402732767496	Wellbeing	Lockdown restrictions are unjustified	*
<2h	1.0114675367273185	0.8719627438285684	Hours online	Lockdown restrictions are unjustified	0.8719627438285684
4-6h	0.8844418332472461	0.08895112421197153	Hours online	Lockdown restrictions are unjustified	0.08895112421197153
6-8h	0.9899300919317754	0.9032282972337764	Hours online	Lockdown restrictions are unjustified	0.9032282972337764
8-10h	0.8357653673826932	0.08243402285170735	Hours online	Lockdown restrictions are unjustified	0.08243402285170735
10-14h	1.0152806096692013	0.9002463307258146	Hours online	Lockdown restrictions are unjustified	0.9002463307258146
>14h	1.4307690556328232	0.023463197843551244	Hours online	Lockdown restrictions are unjustified	*
51-60 - REF	1.0	REFERENCE	Age	Lockdown restrictions are unjustified	REFERENCE
Female - REF	1.0	REFERENCE	Sex	Lockdown restrictions are unjustified	REFERENCE
United Kingdom - REF	1.0	REFERENCE	Residence	Lockdown restrictions are unjustified	REFERENCE
White European/ North American - REF	1.0	REFERENCE	Ethnicity	Lockdown restrictions are unjustified	REFERENCE
University Degree - REF	1.0	REFERENCE	Education	Lockdown restrictions are unjustified	REFERENCE
Worker - REF	1.0	REFERENCE	Occupation	Lockdown restrictions are unjustified	REFERENCE
None - REF	1.0	REFERENCE	Neurological and/or Psychiatric conditions	Lockdown restrictions are unjustified	REFERENCE
Never used - REF	1.0	REFERENCE	Drug use frequency	Lockdown restrictions are unjustified	REFERENCE
TV - REF	1.0	REFERENCE	News source	Lockdown restrictions are unjustified	REFERENCE
High - REF	1.0	REFERENCE	Wellbeing	Lockdown restrictions are unjustified	REFERENCE
2-4h - REF	1.0	REFERENCE	Hours online	Lockdown restrictions are unjustified	REFERENCE
18-30	2.0560757766515705	1.1808356175304776e-36	Age	Only social distancing occasionally/not at all	***
31-40	1.4548086801934532	1.1174102088598704e-13	Age	Only social distancing occasionally/not at all	***
41-50	1.0073676255853938	0.8779070872924688	Age	Only social distancing occasionally/not at all	0.8779070872924688
61-70	0.9209016161429253	0.12262680922886203	Age	Only social distancing occasionally/not at all	0.12262680922886203
>70	0.7751223323468067	0.0009504923013175964	Age	Only social distancing occasionally/not at all	***
Male	1.1409996425960978	2.0466396102348394e-05	Sex	Only social distancing occasionally/not at all	***
Other	0.9219253663626452	0.7050980155650719	Sex	Only social distancing occasionally/not at all	0.7050980155650719
Abroad	0.8510708615023777	0.008962804439576205	Residence	Only social distancing occasionally/not at all	**
East Asian	1.1266434391017925	0.2640389564126985	Ethnicity	Only social distancing occasionally/not at all	0.2640389564126985
Indian/South/ South East Asian	0.9589970966620117	0.6888852877912983	Ethnicity	Only social distancing occasionally/not at all	0.6888852877912983
Mixed	1.1119722982745825	0.3059891658427686	Ethnicity	Only social distancing occasionally/not at all	0.3059891658427686
Other	1.4492507203983227	0.02959003375806051	Ethnicity	Only social distancing occasionally/not at all	*
Unknown	0.6542538695509061	0.03655663546159568	Ethnicity	Only social distancing occasionally/not at all	*
PhD	0.7746017391512096	0.0002776920797125535	Education	Only social distancing occasionally/not at all	***
Primary/ Elementary School or less	0.857939078230017	0.22233552134412404	Education	Only social distancing occasionally/not at all	0.22233552134412404
Secondary/ High School	1.0127269634204705	0.704636564962152	Education	Only social distancing occasionally/not at all	0.704636564962152
Homemaker	0.7999038912494577	0.02648386060972547	Occupation	Only social distancing occasionally/not at all	*
Retired	0.8448939532764054	0.001859680312644537	Occupation	Only social distancing occasionally/not at all	**
Student	1.1126103770184528	0.14567511853597961	Occupation	Only social distancing occasionally/not at all	0.14567511853597961
Unemployed/ Looking	0.813102794501974	0.014247198055394907	Occupation	Only social distancing occasionally/not at all	*
Unknown	0.9221814887119006	0.7130441604977449	Occupation	Only social distancing occasionally/not at all	0.7130441604977449
Disabled/ Sheltered	0.6529996024007153	0.007865384500908212	Occupation	Only social distancing occasionally/not at all	**
Neurological condition	0.7771526883262123	0.005972844002785194	Neurological and/or Psychiatric conditions	Only social distancing occasionally/not at all	**
Psychiatric condition	0.8978724474627212	0.051180388800903726	Neurological and/or Psychiatric conditions	Only social distancing occasionally/not at all	0.051180388800903726
Neurological & Psychiatric	0.5388522702329595	0.002624121605403519	Neurological and/or Psychiatric conditions	Only social distancing occasionally/not at all	**
Unknown use	0.9569150048884784	0.22228927662328157	Drug use frequency	Only social distancing occasionally/not at all	0.22228927662328157
Less than yearly	1.421378864387732	3.323866639426747e-12	Drug use frequency	Only social distancing occasionally/not at all	***
Yearly	1.7224376388639862	1.2979685838564552e-12	Drug use frequency	Only social distancing occasionally/not at all	***
Monthly	1.986123286667186	1.1140815428584152e-09	Drug use frequency	Only social distancing occasionally/not at all	***
Weekly	1.7692131310661758	4.2345092570302886e-05	Drug use frequency	Only social distancing occasionally/not at all	***
Daily	1.431820443577273	0.010186355866434358	Drug use frequency	Only social distancing occasionally/not at all	*
Internet news sites	1.0900103159671484	0.006483673772112704	News source	Only social distancing occasionally/not at all	**
Governmental communications	0.7393246139984886	6.220874398154524e-21	News source	Only social distancing occasionally/not at all	***
Radio	1.0861058784106106	0.010578469503004338	News source	Only social distancing occasionally/not at all	*
Newspapers	1.00861400968294	0.8009053418267961	News source	Only social distancing occasionally/not at all	0.8009053418267961
Social media	1.0950708443439745	0.020108906823869413	News source	Only social distancing occasionally/not at all	*
Word of mouth	1.3522599191410276	8.733825684781307e-12	News source	Only social distancing occasionally/not at all	***
Podcasts	1.1425435763364815	0.04883056429922538	News source	Only social distancing occasionally/not at all	*
Medium	0.9694911523442098	0.35888968555665657	Wellbeing	Only social distancing occasionally/not at all	0.35888968555665657
Low	0.8043863197120467	0.000693376999930753	Wellbeing	Only social distancing occasionally/not at all	***
<2h	1.063689789191519	0.13889236446109537	Hours online	Only social distancing occasionally/not at all	0.13889236446109537
4-6h	0.9862055717243733	0.7467218955192448	Hours online	Only social distancing occasionally/not at all	0.7467218955192448
6-8h	0.9520110236472891	0.3375636079532217	Hours online	Only social distancing occasionally/not at all	0.3375636079532217
8-10h	0.8341003621994846	0.0026932263267723847	Hours online	Only social distancing occasionally/not at all	**
10-14h	0.7575634820494019	0.0001950420565933314	Hours online	Only social distancing occasionally/not at all	***
>14h	0.9889122930350783	0.9188848425329281	Hours online	Only social distancing occasionally/not at all	0.9188848425329281
51-60 - REF	1.0	REFERENCE	Age	Only social distancing occasionally/not at all	REFERENCE
Female - REF	1.0	REFERENCE	Sex	Only social distancing occasionally/not at all	REFERENCE
United Kingdom - REF	1.0	REFERENCE	Residence	Only social distancing occasionally/not at all	REFERENCE
White European/ North American - REF	1.0	REFERENCE	Ethnicity	Only social distancing occasionally/not at all	REFERENCE
University Degree - REF	1.0	REFERENCE	Education	Only social distancing occasionally/not at all	REFERENCE
Worker - REF	1.0	REFERENCE	Occupation	Only social distancing occasionally/not at all	REFERENCE
None - REF	1.0	REFERENCE	Neurological and/or Psychiatric conditions	Only social distancing occasionally/not at all	REFERENCE
Never used - REF	1.0	REFERENCE	Drug use frequency	Only social distancing occasionally/not at all	REFERENCE
TV - REF	1.0	REFERENCE	News source	Only social distancing occasionally/not at all	REFERENCE
High - REF	1.0	REFERENCE	Wellbeing	Only social distancing occasionally/not at all	REFERENCE
2-4h - REF	1.0	REFERENCE	Hours online	Only social distancing occasionally/not at all	REFERENCE
18-30	0.8782498319129235	0.04796058998986907	Age	Avoid leaving the house	*
31-40	0.8853625218114933	0.032445408639861464	Age	Avoid leaving the house	*
41-50	1.0036676998066696	0.944181127775596	Age	Avoid leaving the house	0.944181127775596
61-70	0.903381610260223	0.07406782950721794	Age	Avoid leaving the house	0.07406782950721794
>70	0.6244998882626227	3.622878063559014e-09	Age	Avoid leaving the house	***
Male	1.5170593199562483	1.4320006108978547e-34	Sex	Avoid leaving the house	***
Other	0.6729745382996251	0.13685373977994916	Sex	Avoid leaving the house	0.13685373977994916
Abroad	0.7995193679933107	0.0009685262166436433	Residence	Avoid leaving the house	***
East Asian	0.8114549228624487	0.08618522230997958	Ethnicity	Avoid leaving the house	0.08618522230997958
Indian/South/ South East Asian	0.6909745362968107	0.0025988065411308896	Ethnicity	Avoid leaving the house	**
Mixed	0.9466930416585277	0.6464320428659109	Ethnicity	Avoid leaving the house	0.6464320428659109
Other	0.6524541402378304	0.032998894069610825	Ethnicity	Avoid leaving the house	*
Unknown	0.8740034455695596	0.519075640661838	Ethnicity	Avoid leaving the house	0.519075640661838
PhD	0.7904135576580202	0.0019715921348203618	Education	Avoid leaving the house	**
Primary/ Elementary School or less	1.2900325505470582	0.06304314785372331	Education	Avoid leaving the house	0.06304314785372331
Secondary/ High School	1.0338661763641308	0.36120675339913144	Education	Avoid leaving the house	0.36120675339913144
Homemaker	0.6322477319354806	3.062952790187892e-05	Occupation	Avoid leaving the house	***
Retired	0.7339995880225012	7.705053536926145e-08	Occupation	Avoid leaving the house	***
Student	0.9620841066010006	0.6587383484162942	Occupation	Avoid leaving the house	0.6587383484162942
Unemployed/ Looking	0.7651703842274319	0.00412475104021848	Occupation	Avoid leaving the house	**
Unknown	0.6827267458559498	0.10584305210093466	Occupation	Avoid leaving the house	0.10584305210093466
Disabled/ Sheltered	0.32052158090003596	3.1804260495159706e-08	Occupation	Avoid leaving the house	***
Neurological condition	0.6789418518672856	0.00010141759304438615	Neurological and/or Psychiatric conditions	Avoid leaving the house	***
Psychiatric condition	0.7692234665452737	3.831508018025821e-05	Neurological and/or Psychiatric conditions	Avoid leaving the house	***
Neurological & Psychiatric	0.5890278204216313	0.029525249724959537	Neurological and/or Psychiatric conditions	Avoid leaving the house	*
Unknown use	1.0807368424912573	0.050633647195591006	Drug use frequency	Avoid leaving the house	0.050633647195591006
Less than yearly	0.9336538126657845	0.2271953699208782	Drug use frequency	Avoid leaving the house	0.2271953699208782
Yearly	1.0294698604513026	0.7398821370766311	Drug use frequency	Avoid leaving the house	0.7398821370766311
Monthly	1.0202466076079137	0.8755083850570983	Drug use frequency	Avoid leaving the house	0.8755083850570983
Weekly	1.6273185815295468	0.002908346491755557	Drug use frequency	Avoid leaving the house	**
Daily	0.8754051036839706	0.40047762366712925	Drug use frequency	Avoid leaving the house	0.40047762366712925
Internet news sites	0.8974705331266997	0.0017980068788843112	News source	Avoid leaving the house	**
Governmental communications	0.7408684227840945	1.2610060867783553e-17	News source	Avoid leaving the house	***
Radio	1.150006623440206	7.714700747076317e-05	News source	Avoid leaving the house	***
Newspapers	1.1070683536596606	0.006154509719571692	News source	Avoid leaving the house	**
Social media	0.8514856485967043	0.0003091205055902798	News source	Avoid leaving the house	***
Word of mouth	1.2461203494797768	1.425028908413291e-05	News source	Avoid leaving the house	***
Podcasts	1.1164763185123976	0.13927371230428676	News source	Avoid leaving the house	0.13927371230428676
Medium	0.5668509976457203	5.025043407883149e-52	Wellbeing	Avoid leaving the house	***
Low	0.39911695618253523	1.8600105786707306e-33	Wellbeing	Avoid leaving the house	***
<2h	1.303448190999117	3.980888879948824e-09	Hours online	Avoid leaving the house	***
4-6h	0.8445570092545571	0.0003605061735681854	Hours online	Avoid leaving the house	***
6-8h	0.7221747054292994	1.4012822621348578e-08	Hours online	Avoid leaving the house	***
8-10h	0.6129848526835433	3.4159476076299956e-13	Hours online	Avoid leaving the house	***
10-14h	0.5315835024218324	1.1807248896508145e-13	Hours online	Avoid leaving the house	***
>14h	0.7363991733131848	0.010715150047721488	Hours online	Avoid leaving the house	*
51-60 - REF	1.0	REFERENCE	Age	Avoid leaving the house	REFERENCE
Female - REF	1.0	REFERENCE	Sex	Avoid leaving the house	REFERENCE
United Kingdom - REF	1.0	REFERENCE	Residence	Avoid leaving the house	REFERENCE
White European/ North American - REF	1.0	REFERENCE	Ethnicity	Avoid leaving the house	REFERENCE
University Degree - REF	1.0	REFERENCE	Education	Avoid leaving the house	REFERENCE
Worker - REF	1.0	REFERENCE	Occupation	Avoid leaving the house	REFERENCE
None - REF	1.0	REFERENCE	Neurological and/or Psychiatric conditions	Avoid leaving the house	REFERENCE
Never used - REF	1.0	REFERENCE	Drug use frequency	Avoid leaving the house	REFERENCE
TV - REF	1.0	REFERENCE	News source	Avoid leaving the house	REFERENCE
High - REF	1.0	REFERENCE	Wellbeing	Avoid leaving the house	REFERENCE
2-4h - REF	1.0	REFERENCE	Hours online	Avoid leaving the house	REFERENCE
18-30	1.4351237443678768	9.3690640117591e-07	Age	No longer avoiding leaving the house	***
31-40	1.1970869774309747	0.0076928507751225245	Age	No longer avoiding leaving the house	**
41-50	1.0953842726140575	0.1592476407393434	Age	No longer avoiding leaving the house	0.1592476407393434
61-70	0.837891993594463	0.016830187639481183	Age	No longer avoiding leaving the house	*
>70	0.6498213561836669	3.841081401149635e-05	Age	No longer avoiding leaving the house	***
Male	1.047472217775238	0.2616690793590347	Sex	No longer avoiding leaving the house	0.2616690793590347
Other	0.6119675921049579	0.09639021641688567	Sex	No longer avoiding leaving the house	0.09639021641688567
Abroad	1.0263852356817447	0.7400102770866361	Residence	No longer avoiding leaving the house	0.7400102770866361
East Asian	0.9091088161374559	0.49774765576231406	Ethnicity	No longer avoiding leaving the house	0.49774765576231406
Indian/South/ South East Asian	0.9519550729826834	0.7078202650027151	Ethnicity	No longer avoiding leaving the house	0.7078202650027151
Mixed	1.048796914572557	0.7186786821542852	Ethnicity	No longer avoiding leaving the house	0.7186786821542852
Other	0.8725354822662545	0.532076796851473	Ethnicity	No longer avoiding leaving the house	0.532076796851473
Unknown	0.6983371154807881	0.17244903089853236	Ethnicity	No longer avoiding leaving the house	0.17244903089853236
PhD	0.7810979350504461	0.008245884547757206	Education	No longer avoiding leaving the house	**
Primary/ Elementary School or less	1.5052777592160713	0.011114879117416173	Education	No longer avoiding leaving the house	*
Secondary/ High School	1.0189481862719116	0.6736642647087392	Education	No longer avoiding leaving the house	0.6736642647087392
Homemaker	0.6249646453762259	0.0003852667773240111	Occupation	No longer avoiding leaving the house	***
Retired	0.8027748200160899	0.003278820158444052	Occupation	No longer avoiding leaving the house	**
Student	1.0371973201409017	0.6820639310563762	Occupation	No longer avoiding leaving the house	0.6820639310563762
Unemployed/ Looking	0.6421074108680666	0.0001451542350672393	Occupation	No longer avoiding leaving the house	***
Unknown	0.47705029256420833	0.02876447829418212	Occupation	No longer avoiding leaving the house	*
Disabled/ Sheltered	0.4114171424681463	7.206127034393165e-05	Occupation	No longer avoiding leaving the house	***
Neurological condition	0.6547274384293857	0.0006198594516881278	Neurological and/or Psychiatric conditions	No longer avoiding leaving the house	***
Psychiatric condition	0.8053287847910741	0.002271192589670105	Neurological and/or Psychiatric conditions	No longer avoiding leaving the house	**
Neurological & Psychiatric	0.6051047046603898	0.060458084648606254	Neurological and/or Psychiatric conditions	No longer avoiding leaving the house	0.060458084648606254
Unknown use	1.2009690233197199	0.00011253271654721695	Drug use frequency	No longer avoiding leaving the house	***
Less than yearly	1.0308603485154402	0.6588066537370414	Drug use frequency	No longer avoiding leaving the house	0.6588066537370414
Yearly	1.1627958949126476	0.12865431416401407	Drug use frequency	No longer avoiding leaving the house	0.12865431416401407
Monthly	1.2045113889724537	0.18273928217615265	Drug use frequency	No longer avoiding leaving the house	0.18273928217615265
Weekly	1.9799134923414394	0.00010686079241243933	Drug use frequency	No longer avoiding leaving the house	***
Daily	0.8364839851718114	0.37255384337575215	Drug use frequency	No longer avoiding leaving the house	0.37255384337575215
Internet news sites	0.9104107125660496	0.02538226949014941	News source	No longer avoiding leaving the house	*
Governmental communications	0.6362845390917867	9.962624032534441e-26	News source	No longer avoiding leaving the house	***
Radio	1.1198262119329798	0.008721129611872226	News source	No longer avoiding leaving the house	**
Newspapers	1.124451992632593	0.009503428254791313	News source	No longer avoiding leaving the house	**
Social media	1.0755939652086157	0.14758984880774803	News source	No longer avoiding leaving the house	0.14758984880774803
Word of mouth	1.2913799194365738	8.166271659208478e-06	News source	No longer avoiding leaving the house	***
Podcasts	0.8557320051064736	0.09595979971392457	News source	No longer avoiding leaving the house	0.09595979971392457
Medium	0.9365177644206868	0.13511281812273074	Wellbeing	No longer avoiding leaving the house	0.13511281812273074
Low	0.721462241740432	6.242658758135757e-05	Wellbeing	No longer avoiding leaving the house	***
<2h	1.1158396214202684	0.05419724389037958	Hours online	No longer avoiding leaving the house	0.05419724389037958
4-6h	0.878093920064852	0.020931876576846403	Hours online	No longer avoiding leaving the house	*
6-8h	0.8014804307673266	0.0009008584222179885	Hours online	No longer avoiding leaving the house	***
8-10h	0.5783564710005419	1.5120894217220157e-11	Hours online	No longer avoiding leaving the house	***
10-14h	0.5990778209085305	1.364997296382094e-07	Hours online	No longer avoiding leaving the house	***
>14h	0.5494032781641199	0.00014062319532237276	Hours online	No longer avoiding leaving the house	***
51-60 - REF	1.0	REFERENCE	Age	No longer avoiding leaving the house	REFERENCE
Female - REF	1.0	REFERENCE	Sex	No longer avoiding leaving the house	REFERENCE
United Kingdom - REF	1.0	REFERENCE	Residence	No longer avoiding leaving the house	REFERENCE
White European/ North American - REF	1.0	REFERENCE	Ethnicity	No longer avoiding leaving the house	REFERENCE
University Degree - REF	1.0	REFERENCE	Education	No longer avoiding leaving the house	REFERENCE
Worker - REF	1.0	REFERENCE	Occupation	No longer avoiding leaving the house	REFERENCE
None - REF	1.0	REFERENCE	Neurological and/or Psychiatric conditions	No longer avoiding leaving the house	REFERENCE
Never used - REF	1.0	REFERENCE	Drug use frequency	No longer avoiding leaving the house	REFERENCE
TV - REF	1.0	REFERENCE	News source	No longer avoiding leaving the house	REFERENCE
High - REF	1.0	REFERENCE	Wellbeing	No longer avoiding leaving the house	REFERENCE
2-4h - REF	1.0	REFERENCE	Hours online	No longer avoiding leaving the house	REFERENCE
18-30	0.7992986137996984	0.005603490858077717	Age	NHS app not working on their phone	**
31-40	0.71795815338938	6.219166043145733e-06	Age	NHS app not working on their phone	***
41-50	0.7547312535841517	2.2766231164093752e-05	Age	NHS app not working on their phone	***
61-70	1.3167082084688924	2.964183529354205e-05	Age	NHS app not working on their phone	***
>70	2.1509160608567126	1.1395185262169854e-18	Age	NHS app not working on their phone	***
Male	0.9456138151655004	0.16888146973498896	Sex	NHS app not working on their phone	0.16888146973498896
Other	1.072705318045098	0.8101469016328549	Sex	NHS app not working on their phone	0.8101469016328549
Abroad	3.6423952005111175	2.199889984859196e-82	Residence	NHS app not working on their phone	***
East Asian	0.937621689960455	0.6700128647743109	Ethnicity	NHS app not working on their phone	0.6700128647743109
Indian/South/ South East Asian	1.7269649549943153	3.556946974059319e-05	Ethnicity	NHS app not working on their phone	***
Mixed	1.102088639166736	0.4996231466872595	Ethnicity	NHS app not working on their phone	0.4996231466872595
Other	1.0166953837896124	0.9440674206243125	Ethnicity	NHS app not working on their phone	0.9440674206243125
Unknown	0.5084231562155265	0.011363840684009629	Ethnicity	NHS app not working on their phone	*
PhD	1.3795995947612152	0.00021283619619027756	Education	NHS app not working on their phone	***
Primary/ Elementary School or less	1.3310799706776617	0.04859816007927424	Education	NHS app not working on their phone	*
Secondary/ High School	1.0329286866303995	0.453507977024033	Education	NHS app not working on their phone	0.453507977024033
Homemaker	1.2972568907458764	0.03828611374309999	Occupation	NHS app not working on their phone	*
Retired	0.9482125207372699	0.4217919183333837	Occupation	NHS app not working on their phone	0.4217919183333837
Student	1.1956694070326088	0.08298658980771124	Occupation	NHS app not working on their phone	0.08298658980771124
Unemployed/ Looking	1.9506374746433204	1.077636185185522e-10	Occupation	NHS app not working on their phone	***
Unknown	1.5671432661412505	0.09786322620415795	Occupation	NHS app not working on their phone	0.09786322620415795
Disabled/ Sheltered	1.9722725816663507	6.581905425350451e-05	Occupation	NHS app not working on their phone	***
Neurological condition	1.2379269672186564	0.04554420273987942	Neurological and/or Psychiatric conditions	NHS app not working on their phone	*
Psychiatric condition	1.1080120003062395	0.15640186072395296	Neurological and/or Psychiatric conditions	NHS app not working on their phone	0.15640186072395296
Neurological & Psychiatric	1.5011091918940798	0.0823780107199598	Neurological and/or Psychiatric conditions	NHS app not working on their phone	0.0823780107199598
Unknown use	0.8671133196055385	0.0026810978852947987	Drug use frequency	NHS app not working on their phone	**
Less than yearly	0.9878768373983697	0.861522743856409	Drug use frequency	NHS app not working on their phone	0.861522743856409
Yearly	0.7694341260954075	0.01952702471313714	Drug use frequency	NHS app not working on their phone	*
Monthly	1.055409188829687	0.7242675643926657	Drug use frequency	NHS app not working on their phone	0.7242675643926657
Weekly	1.270261414614989	0.20891308705452938	Drug use frequency	NHS app not working on their phone	0.20891308705452938
Daily	1.7778378248898332	0.0007484335814453708	Drug use frequency	NHS app not working on their phone	***
Internet news sites	0.9622622790850724	0.3494940577875968	News source	NHS app not working on their phone	0.3494940577875968
Governmental communications	0.7905611312083156	2.831895808335585e-08	News source	NHS app not working on their phone	***
Radio	0.9984844327662401	0.9712873549639081	News source	NHS app not working on their phone	0.9712873549639081
Newspapers	1.082355978504801	0.06976820400956942	News source	NHS app not working on their phone	0.06976820400956942
Social media	0.8421490046776883	0.0018610610106266974	News source	NHS app not working on their phone	**
Word of mouth	1.1235409740855704	0.058145733867633886	News source	NHS app not working on their phone	0.058145733867633886
Podcasts	0.9467443402268733	0.5650310402464139	News source	NHS app not working on their phone	0.5650310402464139
Medium	1.0259362290619414	0.5685500287425553	Wellbeing	NHS app not working on their phone	0.5685500287425553
Low	1.1379808602944501	0.1290271778642837	Wellbeing	NHS app not working on their phone	0.1290271778642837
<2h	1.2894582644646524	8.754221098662866e-07	Hours online	NHS app not working on their phone	***
4-6h	0.9271961780885996	0.18868187202324826	Hours online	NHS app not working on their phone	0.18868187202324826
6-8h	0.8470826530106501	0.02044642421596184	Hours online	NHS app not working on their phone	*
8-10h	0.8740149902011543	0.11009467576696187	Hours online	NHS app not working on their phone	0.11009467576696187
10-14h	0.8693009156194006	0.17797614644461834	Hours online	NHS app not working on their phone	0.17797614644461834
>14h	0.9683041736465284	0.8291953056339597	Hours online	NHS app not working on their phone	0.8291953056339597
51-60 - REF	1.0	REFERENCE	Age	NHS app not working on their phone	REFERENCE
Female - REF	1.0	REFERENCE	Sex	NHS app not working on their phone	REFERENCE
United Kingdom - REF	1.0	REFERENCE	Residence	NHS app not working on their phone	REFERENCE
White European/ North American - REF	1.0	REFERENCE	Ethnicity	NHS app not working on their phone	REFERENCE
University Degree - REF	1.0	REFERENCE	Education	NHS app not working on their phone	REFERENCE
Worker - REF	1.0	REFERENCE	Occupation	NHS app not working on their phone	REFERENCE
None - REF	1.0	REFERENCE	Neurological and/or Psychiatric conditions	NHS app not working on their phone	REFERENCE
Never used - REF	1.0	REFERENCE	Drug use frequency	NHS app not working on their phone	REFERENCE
TV - REF	1.0	REFERENCE	News source	NHS app not working on their phone	REFERENCE
High - REF	1.0	REFERENCE	Wellbeing	NHS app not working on their phone	REFERENCE
2-4h - REF	1.0	REFERENCE	Hours online	NHS app not working on their phone	REFERENCE
18-30	1.1398680204031972	0.08182174208014278	Age	Not wanting to be tracked through the NHS app	0.08182174208014278
31-40	1.2728896357825477	0.00022766094464201194	Age	Not wanting to be tracked through the NHS app	***
41-50	1.059401716784334	0.35612313391556516	Age	Not wanting to be tracked through the NHS app	0.35612313391556516
61-70	0.7979061749691281	0.002748993127933214	Age	Not wanting to be tracked through the NHS app	**
>70	0.696333464998569	0.001994613500684481	Age	Not wanting to be tracked through the NHS app	**
Male	0.9209999780530027	0.04999419688390297	Sex	Not wanting to be tracked through the NHS app	*
Other	1.07770296279598	0.7959719686982658	Sex	Not wanting to be tracked through the NHS app	0.7959719686982658
Abroad	1.3545661132890592	0.0005663851578844737	Residence	Not wanting to be tracked through the NHS app	***
East Asian	1.0253099333337772	0.8585047446430636	Ethnicity	Not wanting to be tracked through the NHS app	0.8585047446430636
Indian/South/ South East Asian	1.0410223396914335	0.7807239131202239	Ethnicity	Not wanting to be tracked through the NHS app	0.7807239131202239
Mixed	1.0984891113948478	0.49211822073253997	Ethnicity	Not wanting to be tracked through the NHS app	0.49211822073253997
Other	1.2159517938281297	0.3674211631502112	Ethnicity	Not wanting to be tracked through the NHS app	0.3674211631502112
Unknown	0.637880176661136	0.11691591630310767	Ethnicity	Not wanting to be tracked through the NHS app	0.11691591630310767
PhD	1.1326368444506316	0.178835827846489	Education	Not wanting to be tracked through the NHS app	0.178835827846489
Primary/ Elementary School or less	1.161348247447782	0.37113677582514193	Education	Not wanting to be tracked through the NHS app	0.37113677582514193
Secondary/ High School	1.060638352530081	0.1920008990184594	Education	Not wanting to be tracked through the NHS app	0.1920008990184594
Homemaker	1.1184296774756082	0.36977240842558234	Occupation	Not wanting to be tracked through the NHS app	0.36977240842558234
Retired	0.7454167245526179	0.0001417919528401772	Occupation	Not wanting to be tracked through the NHS app	***
Student	0.9316539802032101	0.46573000502166606	Occupation	Not wanting to be tracked through the NHS app	0.46573000502166606
Unemployed/ Looking	1.3672631371936292	0.004122445685462533	Occupation	Not wanting to be tracked through the NHS app	**
Unknown	1.7378472169076886	0.041624896032071944	Occupation	Not wanting to be tracked through the NHS app	*
Disabled/ Sheltered	1.3242816738436873	0.1604503573685374	Occupation	Not wanting to be tracked through the NHS app	0.1604503573685374
Neurological condition	0.6918703084254741	0.0075208724484166255	Neurological and/or Psychiatric conditions	Not wanting to be tracked through the NHS app	**
Psychiatric condition	0.8329553857732449	0.01593125134114704	Neurological and/or Psychiatric conditions	Not wanting to be tracked through the NHS app	*
Neurological & Psychiatric	0.9724749264237883	0.9156552485191648	Neurological and/or Psychiatric conditions	Not wanting to be tracked through the NHS app	0.9156552485191648
Unknown use	0.9204319005692191	0.08933886179776891	Drug use frequency	Not wanting to be tracked through the NHS app	0.08933886179776891
Less than yearly	1.0157651968817611	0.8199850407120051	Drug use frequency	Not wanting to be tracked through the NHS app	0.8199850407120051
Yearly	0.8481875695565135	0.11620406871932215	Drug use frequency	Not wanting to be tracked through the NHS app	0.11620406871932215
Monthly	1.028770404238422	0.8454015285092704	Drug use frequency	Not wanting to be tracked through the NHS app	0.8454015285092704
Weekly	1.8858733558141008	0.000101432448979345	Drug use frequency	Not wanting to be tracked through the NHS app	***
Daily	1.4018199118875616	0.06642584135296287	Drug use frequency	Not wanting to be tracked through the NHS app	0.06642584135296287
Internet news sites	0.9589456310978702	0.325496222715114	News source	Not wanting to be tracked through the NHS app	0.325496222715114
Governmental communications	0.7788074826209928	7.833503467357588e-09	News source	Not wanting to be tracked through the NHS app	***
Radio	0.9516706534612045	0.25953850893851205	News source	Not wanting to be tracked through the NHS app	0.25953850893851205
Newspapers	1.187732153335093	0.00016874906356389806	News source	Not wanting to be tracked through the NHS app	***
Social media	0.8547567072118581	0.003174781537397303	News source	Not wanting to be tracked through the NHS app	**
Word of mouth	1.352029963916194	1.2988719990617026e-07	News source	Not wanting to be tracked through the NHS app	***
Podcasts	1.1598422727670241	0.09392996775342553	News source	Not wanting to be tracked through the NHS app	0.09392996775342553
Medium	0.9601916886079043	0.37005155107728893	Wellbeing	Not wanting to be tracked through the NHS app	0.37005155107728893
Low	0.9774196544947205	0.7895035481504368	Wellbeing	Not wanting to be tracked through the NHS app	0.7895035481504368
<2h	1.1136312250809632	0.05395863549735426	Hours online	Not wanting to be tracked through the NHS app	0.05395863549735426
4-6h	0.8252303929490541	0.0009541587201281906	Hours online	Not wanting to be tracked through the NHS app	***
6-8h	0.757598006845023	6.992016047662494e-05	Hours online	Not wanting to be tracked through the NHS app	***
8-10h	0.7440141968203416	0.00031686533886327717	Hours online	Not wanting to be tracked through the NHS app	***
10-14h	0.7636260344342636	0.0071474783243415455	Hours online	Not wanting to be tracked through the NHS app	**
>14h	0.9854500571240908	0.9179740784831265	Hours online	Not wanting to be tracked through the NHS app	0.9179740784831265
51-60 - REF	1.0	REFERENCE	Age	Not wanting to be tracked through the NHS app	REFERENCE
Female - REF	1.0	REFERENCE	Sex	Not wanting to be tracked through the NHS app	REFERENCE
United Kingdom - REF	1.0	REFERENCE	Residence	Not wanting to be tracked through the NHS app	REFERENCE
White European/ North American - REF	1.0	REFERENCE	Ethnicity	Not wanting to be tracked through the NHS app	REFERENCE
University Degree - REF	1.0	REFERENCE	Education	Not wanting to be tracked through the NHS app	REFERENCE
Worker - REF	1.0	REFERENCE	Occupation	Not wanting to be tracked through the NHS app	REFERENCE
None - REF	1.0	REFERENCE	Neurological and/or Psychiatric conditions	Not wanting to be tracked through the NHS app	REFERENCE
Never used - REF	1.0	REFERENCE	Drug use frequency	Not wanting to be tracked through the NHS app	REFERENCE
TV - REF	1.0	REFERENCE	News source	Not wanting to be tracked through the NHS app	REFERENCE
High - REF	1.0	REFERENCE	Wellbeing	Not wanting to be tracked through the NHS app	REFERENCE
2-4h - REF	1.0	REFERENCE	Hours online	Not wanting to be tracked through the NHS app	REFERENCE
18-30	0.9645720588945147	0.6910505485230732	Age	Not trusting the government with the NHS app data	0.6910505485230732
31-40	1.0848960847589364	0.31147751197720164	Age	Not trusting the government with the NHS app data	0.31147751197720164
41-50	0.934247910476551	0.3817933841433875	Age	Not trusting the government with the NHS app data	0.3817933841433875
61-70	0.9212400782117849	0.37450418890363035	Age	Not trusting the government with the NHS app data	0.37450418890363035
>70	0.9201264697820879	0.5613860430666439	Age	Not trusting the government with the NHS app data	0.5613860430666439
Male	1.2260238048644392	8.320710970655214e-05	Sex	Not trusting the government with the NHS app data	***
Other	2.255565461941066	0.0025687582743689906	Sex	Not trusting the government with the NHS app data	**
Abroad	1.1523109734695645	0.19598837665459978	Residence	Not trusting the government with the NHS app data	0.19598837665459978
East Asian	0.9417110635437009	0.7399684024595632	Ethnicity	Not trusting the government with the NHS app data	0.7399684024595632
Indian/South/ South East Asian	1.6059689043236876	0.0015266740091988407	Ethnicity	Not trusting the government with the NHS app data	**
Mixed	1.3772590771971258	0.034399897026217284	Ethnicity	Not trusting the government with the NHS app data	*
Other	1.8585971470545979	0.006878137970377042	Ethnicity	Not trusting the government with the NHS app data	**
Unknown	1.2563922209905607	0.4063792489697612	Ethnicity	Not trusting the government with the NHS app data	0.4063792489697612
PhD	1.0847315156719073	0.46943673229621663	Education	Not trusting the government with the NHS app data	0.46943673229621663
Primary/ Elementary School or less	0.9344664629175473	0.7580443720831155	Education	Not trusting the government with the NHS app data	0.7580443720831155
Secondary/ High School	1.030436904687923	0.5908729751985552	Education	Not trusting the government with the NHS app data	0.5908729751985552
Homemaker	1.2039607464423576	0.23660781340678083	Occupation	Not trusting the government with the NHS app data	0.23660781340678083
Retired	0.7164295020302296	0.0005090459616887828	Occupation	Not trusting the government with the NHS app data	***
Student	0.8351282625180338	0.1227399027797505	Occupation	Not trusting the government with the NHS app data	0.1227399027797505
Unemployed/ Looking	1.4088404980048377	0.006470887172732816	Occupation	Not trusting the government with the NHS app data	**
Unknown	2.0810260976411348	0.01444247317500906	Occupation	Not trusting the government with the NHS app data	*
Disabled/ Sheltered	0.9229503374078974	0.7476692327636618	Occupation	Not trusting the government with the NHS app data	0.7476692327636618
Neurological condition	1.0553072695046757	0.7098174093239193	Neurological and/or Psychiatric conditions	Not trusting the government with the NHS app data	0.7098174093239193
Psychiatric condition	0.9445853650624134	0.510734157834875	Neurological and/or Psychiatric conditions	Not trusting the government with the NHS app data	0.510734157834875
Neurological & Psychiatric	1.305553807804266	0.3454131522313937	Neurological and/or Psychiatric conditions	Not trusting the government with the NHS app data	0.3454131522313937
Unknown use	1.1236136717269425	0.05039470537663935	Drug use frequency	Not trusting the government with the NHS app data	0.05039470537663935
Less than yearly	1.251972899547861	0.005590926746542798	Drug use frequency	Not trusting the government with the NHS app data	**
Yearly	1.0570694879812406	0.641037953142539	Drug use frequency	Not trusting the government with the NHS app data	0.641037953142539
Monthly	1.30951647732809	0.10407001488207408	Drug use frequency	Not trusting the government with the NHS app data	0.10407001488207408
Weekly	1.5256938952310073	0.041761232604064835	Drug use frequency	Not trusting the government with the NHS app data	*
Daily	1.7503092822152153	0.006113160056039707	Drug use frequency	Not trusting the government with the NHS app data	**
Internet news sites	0.9380929992800898	0.22524477043121582	News source	Not trusting the government with the NHS app data	0.22524477043121582
Governmental communications	0.6982356476409461	2.9319395767500625e-11	News source	Not trusting the government with the NHS app data	***
Radio	0.9307670317099658	0.18610727636120528	News source	Not trusting the government with the NHS app data	0.18610727636120528
Newspapers	1.358944217568247	2.365918634421043e-08	News source	Not trusting the government with the NHS app data	***
Social media	1.2043405595453585	0.002220906917677045	News source	Not trusting the government with the NHS app data	**
Word of mouth	1.1458636116695822	0.05337430368141971	News source	Not trusting the government with the NHS app data	0.05337430368141971
Podcasts	1.4095983345647343	0.00041022285770319554	News source	Not trusting the government with the NHS app data	***
Medium	1.2057944828076985	0.0007222962569344317	Wellbeing	Not trusting the government with the NHS app data	***
Low	1.4854910422370253	3.130832522004226e-05	Wellbeing	Not trusting the government with the NHS app data	***
<2h	0.9141151118546569	0.23125460503894024	Hours online	Not trusting the government with the NHS app data	0.23125460503894024
4-6h	0.9615340156266294	0.5786781196471525	Hours online	Not trusting the government with the NHS app data	0.5786781196471525
6-8h	0.9905589269520657	0.907502506198318	Hours online	Not trusting the government with the NHS app data	0.907502506198318
8-10h	1.032470276336785	0.7314415153946945	Hours online	Not trusting the government with the NHS app data	0.7314415153946945
10-14h	0.9558857907680316	0.6938162333511926	Hours online	Not trusting the government with the NHS app data	0.6938162333511926
>14h	0.9641109515230792	0.8330932067557124	Hours online	Not trusting the government with the NHS app data	0.8330932067557124
51-60 - REF	1.0	REFERENCE	Age	Not trusting the government with the NHS app data	REFERENCE
Female - REF	1.0	REFERENCE	Sex	Not trusting the government with the NHS app data	REFERENCE
United Kingdom - REF	1.0	REFERENCE	Residence	Not trusting the government with the NHS app data	REFERENCE
White European/ North American - REF	1.0	REFERENCE	Ethnicity	Not trusting the government with the NHS app data	REFERENCE
University Degree - REF	1.0	REFERENCE	Education	Not trusting the government with the NHS app data	REFERENCE
Worker - REF	1.0	REFERENCE	Occupation	Not trusting the government with the NHS app data	REFERENCE
None - REF	1.0	REFERENCE	Neurological and/or Psychiatric conditions	Not trusting the government with the NHS app data	REFERENCE
Never used - REF	1.0	REFERENCE	Drug use frequency	Not trusting the government with the NHS app data	REFERENCE
TV - REF	1.0	REFERENCE	News source	Not trusting the government with the NHS app data	REFERENCE
High - REF	1.0	REFERENCE	Wellbeing	Not trusting the government with the NHS app data	REFERENCE
2-4h - REF	1.0	REFERENCE	Hours online	Not trusting the government with the NHS app data	REFERENCE
